# Supplementary material for: Wnt Signaling Mediates LTP-Dependent Spine Plasticity and AMPAR Localization through Frizzled-7 Receptors
Source: PubMed Central journal article supplement (PMC5946458; doi:10.1016/j.celrep.2018.03.119), 2018-04-25
Supplement: mmc2.pdf [file mmc2.pdf]

# Wnt Signaling Mediates LTP-Dependent Spine Plasticity and AMPAR Localization through Frizzled-7 Receptors

## Graphical Abstract

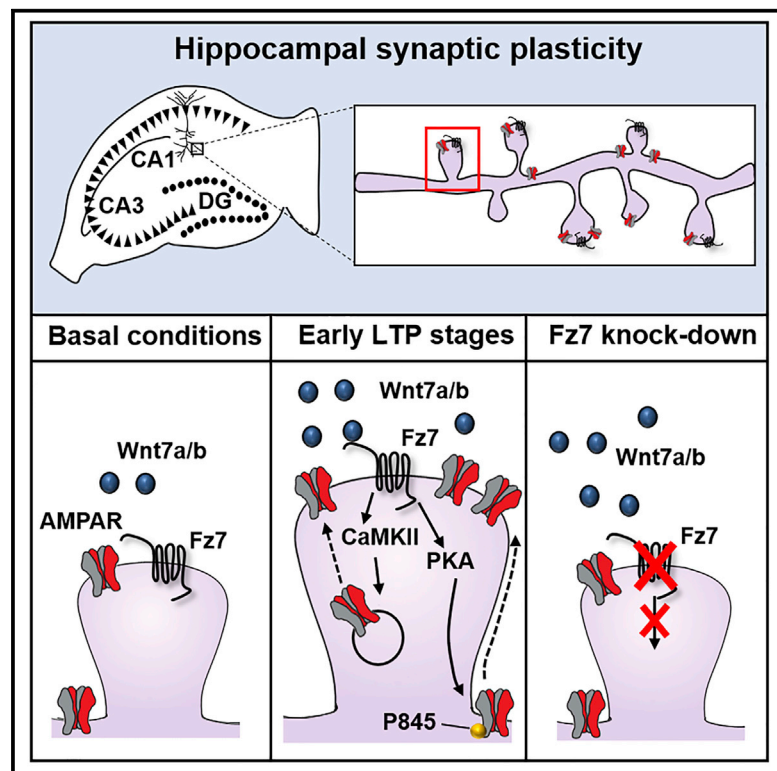

## Authors

Faye McLeod, Alessandro Bossio, Aude Marzo, ..., Trevor G. Smart, Alasdair Gibb, Patricia C. Salinas

## Correspondence

p.salinas@ucl.ac.uk

## In Brief

McLeod et al. reveal that Wnt7a-Fz7 signaling is required for LTP-mediated spine plasticity, AMPAR localization, and synaptic strength through the activation of the CaMKII, ERK, and PKA pathways. Their findings demonstrate that extracellular Wnt proteins are crucial upstream initiators of LTP-mediated structural and function synaptic plasticity.

## Highlights

- LTP-mediated spine plasticity and AMPAR trafficking require Wnt-Fz7 signaling
- LTP induction rapidly elevates Wnt7a/b protein at spines
- Wnt7a induces the fast recruitment of synaptic and extrasynaptic AMPARs
- Wnt7a-Fz7 promotes synaptic AMPAR localization via CaMKII, PKA, and ERK cascades

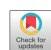

# Wnt Signaling Mediates LTP-Dependent Spine Plasticity and AMPAR Localization through Frizzled-7 Receptors

Faye McLeod,<sup>1</sup> Alessandro Bossio,<sup>1</sup> Aude Marzo,<sup>1</sup> Lorenza Ciani,<sup>1</sup> Sara Sibilla,<sup>1</sup> Saad Hannan,<sup>2</sup> Gemma A. Wilson,<sup>1</sup> Ernest Palomer,<sup>1</sup> Trevor G. Smart,<sup>2</sup> Alasdair Gibb,<sup>2</sup> and Patricia C. Salinas<sup>1,3,\*</sup>

<sup>1</sup>Department of Cell and Developmental Biology, University College London, London WC1E 6BT, UK

<sup>2</sup>Department of Neuroscience, Physiology and Pharmacology, University College London, London WC1E 6BT, UK

<sup>3</sup>Lead Contact

\*Correspondence: [p.salinas@ucl.ac.uk](mailto:p.salinas@ucl.ac.uk)

<https://doi.org/10.1016/j.celrep.2018.03.119>

## SUMMARY

The structural and functional plasticity of synapses is critical for learning and memory. Long-term potentiation (LTP) induction promotes spine growth and AMPAR accumulation at excitatory synapses, leading to increased synaptic strength. Glutamate initiates these processes, but the contribution from extracellular modulators is not fully established. Wnts are required for spine formation; however, their impact on activity-mediated spine plasticity and AMPAR localization is unknown. We found that LTP induction rapidly increased synaptic Wnt7a/b protein levels. Acute blockade of endogenous Wnts or loss of postsynaptic Frizzled-7 (Fz7) receptors impaired LTP-mediated synaptic strength, spine growth, and AMPAR localization at synapses. Live imaging of SEP-GluA1 and single-particle tracking revealed that Wnt7a rapidly promoted synaptic AMPAR recruitment and trapping. Wnt7a, through Fz7, induced CaMKII-dependent loss of SynGAP from spines and increased extrasynaptic AMPARs by PKA phosphorylation. We identify a critical role for Wnt-Fz7 signaling in LTP-mediated synaptic accumulation of AMPARs and spine plasticity.

## INTRODUCTION

Induction of long-term potentiation (LTP), the cellular correlate of learning and memory, triggers profound changes in the structure and function of excitatory synapses by increasing dendritic spine size and synaptic strength. Significant progress has been made in understanding the intracellular pathways underlying LTP. It is well documented that entry of Ca<sup>2+</sup> through N-methyl-D-aspartate receptors (NMDARs) and activation of Ca<sup>2+</sup>/calmodulin-dependent protein kinase II (CaMKII) are key signaling events that lead to spine growth and increased numbers of synaptic  $\alpha$ -amino-3-hydroxy-5-methyl-4-isoxazole propionic acid receptors (AMPARs) (Herring and Nicoll, 2016; Hugarir and Nicoll, 2013; Malenka and Bear, 2004). Both lateral diffusion and exocy-

tosis of AMPARs at the postsynaptic membrane contribute to increased synaptic AMPARs during LTP (Henley and Wilkinson, 2016; Opazo and Choquet, 2011; Penn et al., 2017). Phosphorylation of the AMPAR subunit GluA1 at serine 845 (S845) by protein kinase A (PKA) (Roche et al., 1996) promotes the trafficking of AMPARs to extrasynaptic sites (Esteban et al., 2003; He et al., 2009; Man et al., 2007; Oh et al., 2006; Yang et al., 2008a), which then move to the synapse by lateral diffusion (Borgdorff and Choquet, 2002; Makino and Malinow, 2009). In addition, CaMKII activation leads to membrane insertion and trapping of AMPARs at the synapse during LTP (Esteban et al., 2003; Hayashi et al., 2000; Opazo et al., 2010). Although activation of NMDARs by glutamate initiates these signaling events, the role of other signals in LTP induction is poorly understood.

Synaptic modulators that are regulated by neuronal activity can also contribute to LTP-induced intracellular signaling. For example, brain-derived neurotrophic factor (BDNF), which increases during LTP (Castrén et al., 1993; Verpelli et al., 2010), modulates AMPAR incorporation at the synapse (Caldeira et al., 2007) and promotes spine plasticity (Harward et al., 2016; Tanaka et al., 2008; Zagrebelsky and Korte, 2014). Another major class of synaptic organizers are Wnt-secreted proteins, which are regulated by activity and play a critical role in synapse formation and synaptic transmission (Budnik and Salinas, 2011; Ciani et al., 2015; Dickins and Salinas, 2013). Neuronal activity enhances the release of Wnt proteins at the *Drosophila* neuromuscular junction (NMJ) (Ataman et al., 2008) and increases the expression and/or release of Wnts in hippocampal neurons (Chen et al., 2006; Gogolla et al., 2009; Wayman et al., 2006). Presynaptically, Wnts regulate neurotransmitter release (Cerpa et al., 2008; Ciani et al., 2015). In addition, Wnt proteins postsynaptically increase surface NMDAR levels, promote spine growth, and enhance synaptic strength (Cerpa et al., 2011, 2015; Ciani et al., 2011; McQuate et al., 2017). Although a role for Wnts in LTP has been proposed (Cerpa et al., 2011; Chen et al., 2006; Ivanova et al., 2017; Marzo et al., 2016), their precise function in synaptic plasticity and the mechanisms involved remains elusive.

Here we examined the contribution of Wnt signaling to LTP-associated spine plasticity and AMPAR trafficking. Acute blockade of endogenous Wnts in the hippocampus prevented LTP-dependent increase in synaptic strength and AMPAR localization. LTP induction at Schaffer collateral (SC)-CA1 synapses rapidly increased endogenous Wnt7a/b levels in this region of

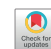

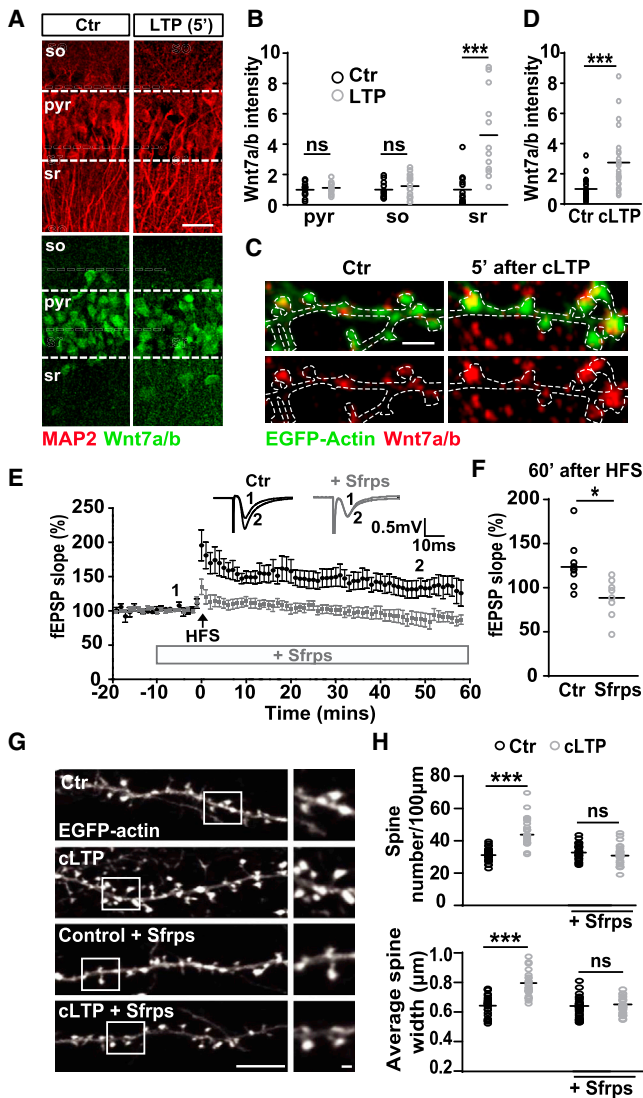

**Figure 1. Wnt Proteins Are Upregulated and Required for Structural and Functional Plasticity during LTP**

(A) Endogenous Wnt7a/b protein (green) in the CA1 pyramidal cell layer (pyr), stratum oriens (so), and stratum radiatum (sr) regions from acute hippocampal slices in control (Ctr) and 5 min after LTP induction. MAP2 (red) used as a reference marker (scale bar: 25  $\mu$ m).

(B) Wnt7a/b fluorescence intensity in control and LTP-induced slices normalized to control levels.  $n = 11\text{--}15$  slices from 3 animals ( $***p < 0.01$ , Student's *t* test).

(C) EGFP-actin-expressing cultured neurons (14 DIV) exposed to control or cLTP conditions. Endogenous Wnt7a/b protein in red (scale bar: 2.5  $\mu$ m).

(D) Wnt7a/b fluorescence intensity (normalized to control) in spines measured 5 min after cLTP treatment.  $n = 24$  cells per condition ( $***p < 0.001$ , Student's *t* test).

(E) Impact on LTP elicited by HFS in control (black) or Sfrp-treated acute hippocampal slices (gray). Insets show averaged fEPSP recordings before HFS (1) and 50–60 min after HFS (2). Data expressed as mean  $\pm$  SEM.

(F) fEPSPs 60 min after HFS (average of last 10 min of recording) in control and Sfrp-treated slices.  $n = 8\text{--}9$  slices from 3–4 animals for each group ( $*p < 0.05$ , Student's *t* test).

(G) Different EGFP-actin-expressing cultured neurons (14 DIV) exposed to control (Ctr) or cLTP conditions in the presence or absence of Sfrps (scale bars: 10 and 1  $\mu$ m on zoomed image).

the hippocampus and at dendritic spines. Loss- and gain-of-function studies showed that Frizzled-7 (Fz7) receptors are required for Wnt7a-mediated spine plasticity and AMPAR localization during LTP. Fz7-deficient principal neurons in the hippocampus exhibited an impaired synaptic potentiation following pairing-induced LTP. Moreover, live imaging of surface super-ecliptic pHluorin (SEP)-tagged GluA1 construct (SEP-GluA1) and quantum dot-tagged GluA1 revealed that Wnt7a rapidly increased the number of AMPARs and reduced their mobility at synapses. Similar to LTP induction, Wnt7a through Fz7 increased phosphorylation of GluA1 at S845 and induced both loss of synaptic Ras-guanosine triphosphatase (GTPase)-activating protein (SynGAP) from spines in a CaMKII-dependent manner and activation of the Ras-extracellular signal-regulated kinase (ERK) pathway, a process that contributes to spine growth and AMPAR recruitment at synapses (Araki et al., 2015; Patterson et al., 2010). Collectively, our results identify a role for Wnts, acting postsynaptically through the Fz7 receptor, as key extracellular signals stimulating spine plasticity and AMPAR synaptic localization during the initial stages of LTP.

## RESULTS

### Neuronal Activity Increases Synaptic Wnt7a/b Levels

Previous studies have shown that synaptic activity regulates the expression levels of Wnts and the surface localization of Frizzled (Fz) receptors (Chen et al., 2006; Gogolla et al., 2009; Li et al., 2012; Sahores et al., 2010; Wayman et al., 2006). We therefore examined whether a potentiating stimulus affects the synaptic levels of endogenous Wnt proteins in the hippocampus. We focused on Wnt7a/b for several reasons. First, Wnt7a/b protein is highly expressed in the hippocampus (Ciani et al., 2011). Second, Wnt7a promotes spine growth and synaptic strength (Ciani et al., 2011). Finally, environmental enrichment increases Wnt7a/b levels in the adult hippocampus (Gogolla et al., 2009).

Five minutes after high-frequency stimulation (HFS) of the SC fibers in acute hippocampal slices, we observed a significant increase in the levels of Wnt7a/b in the stratum radiatum, where SCs synapse with CA1 cell dendrites (Figures 1A and 1B). This effect was specific to the stimulated area, because no significant changes in Wnt7a/b protein levels were detected in the CA1 pyramidal cell body layer, stratum oriens, or neighboring cortical regions (layer 4/5) (Figures 1A and 1B; Figures S1A–S1C). In cultured hippocampal neurons, endogenous Wnt7a/b protein was present at dendritic spines and at low levels along the dendritic shaft (Figure 1C). In contrast, following NMDAR-mediated chemical LTP (cLTP) (Lu et al., 2001), endogenous Wnt7a/b levels were elevated at dendritic spines within a comparable time frame to HFS in brain slices (Figures 1C and 1D).

Given the postsynaptic role of Wnt5a in hippocampal neurons (Cerpa et al., 2011, 2015), we also examined whether endogenous Wnt5a levels were elevated after induction of cLTP. In contrast to Wnt7a/b, Wnt5a was not elevated at dendritic spines of hippocampal neurons after cLTP (Figures S1D and S1E). Thus,

(H) Spine number (above) and spine width (below).  $n = 35\text{--}40$  cells per condition ( $***p < 0.001$ , ANOVA). See also Figures S1 and S2.

LTP induction specifically increases the levels of endogenous Wnt7a/b protein at excitatory synapses, but not Wnt5a.

### Wnt Proteins Are Required for Functional and Structural Plasticity during LTP

The rapid increase in Wnt7a/b levels following LTP induction suggests that these proteins could contribute to LTP-mediated structural and functional plasticity. To test this, we acutely blocked endogenous Wnts during LTP at the SC-CA1 synapse in acute hippocampal slices using the secreted frizzled-related proteins (Sfrps), which bind and inhibit many endogenous Wnts (Gogolla et al., 2009; Hall et al., 2000; Rosso et al., 2005; Sahores et al., 2010). In controls, HFS produced a robust enhancement in field excitatory postsynaptic potential (fEPSP) slope (34% compared to baseline), which was maintained for at least 1 hr. In contrast, Sfrps abolished LTP induction and maintenance (Figures 1E and 1F; Figure S2A). This effect was not due to changes in basal synaptic transmission, because acute application of Sfrps (15 min) did not affect the NMDAR-to-AMPA current ratio or input-output measurements (Figures S2B–S2D). Collectively, these findings suggest that endogenous Wnts are required for the induction of LTP.

It is well documented that a long-term increase in synapse strength is correlated with profound structural changes at dendritic spines (De Roo et al., 2008; Kasai et al., 2010). As Wnt7a regulates spine morphogenesis and synaptic strength (Ciani et al., 2011), we investigated the impact of Wnt blockade on LTP-induced spine formation and growth. In control cultured neurons, cLTP induced a significant increase in spine number and size (Figures 1G and 1H) (Fortin et al., 2010; Stamatakou et al., 2013). In contrast, the presence of Sfrps prevented structural changes at dendritic spines following LTP induction (Figures 1G and 1H), suggesting that endogenous Wnts are required for activity-mediated structural plasticity.

### Wnt Antagonists Block LTP-Mediated AMPAR Localization at Innervated Spines

LTP-mediated increase in spine size correlates with enhanced synaptic AMPAR numbers (Kasai et al., 2010; Matsuzaki et al., 2004), contributing to increased synaptic strength (Makino and Malinow, 2009; Shi et al., 1999; Turrigiano et al., 1998). Therefore, we examined whether Wnts affect the surface localization of endogenous AMPARs (sGluA1 and sGluA2) and the innervation of spines containing AMPARs following cLTP induction in cultured hippocampal neurons. cLTP increased the percentage of innervated spines, identified by their colocalization with a presynaptic marker, vesicular glutamate transporter 1 (vGlut1) (Figures 2A and 2B). cLTP also increased the percentage of spines containing AMPAR subunits GluA1 (Figures 2A and 2B) and GluA2 (Figure S2E). The number of AMPAR-containing synapses increased as determined by the colocalization of vGlut1 and sGluA1 (Figure 2B). In contrast, in the presence of Sfrps, cLTP failed to increase the levels of vGlut1, sGluA1, and sGluA2 at dendritic spines (Figures 2A and 2B; Figure S2E). These results demonstrate that Wnt signaling is required for LTP-dependent spine innervation and enhanced AMPAR localization at dendritic spines. Consistently, cLTP increased the frequency and the amplitude of AMPAR-mediated miniature excitatory postsynaptic currents (mEPSCs) (Figures 2C and 2D) as previously reported for this

cLTP protocol (Fortin et al., 2010; Lu et al., 2001; Stamatakou et al., 2013). In contrast, Sfrps blocked the increase in both frequency and amplitude of mEPSCs induced by cLTP (Figures 2C and 2D), suggesting that endogenous Wnts facilitate synaptic potentiation and AMPAR mobilization.

### Wnt7a Regulates Synaptic AMPAR Localization

Our findings show that endogenous Wnts are required for activity-mediated plasticity and that Wnt7a/b, both of which increase spine number and size (data not shown), are elevated by LTP. Given the high level of homology between Wnt7a and Wnt7b, we focused our subsequent studies on Wnt7a only. In cultured hippocampal neurons, Wnt7a increased spine innervation (spines colocalized with vGlut1) and spines containing GluA1 and GluA2 AMPAR subunits within 3 hr (Figure S3). Consistently, Wnt7a induced a 2-fold increase in the intensity of sGluA1 puncta at spines (Figure S3B). Concomitant with these changes, the number of synapses containing AMPARs increased, as determined by the colocalization of vGlut1 with sGluA1 (Figure S3). Thus, Wnt7a promotes spine innervation and the synaptic localization of AMPARs.

### Fz7 Receptors Are Required for Wnt7a-Mediated Spine Plasticity and AMPAR Localization during LTP

We next investigated the receptor required for Wnt7a-mediated and activity-dependent spine plasticity and AMPAR localization. Our previous studies showed that Frizzled-5 (Fz5), a Wnt receptor present at synapses, is required for Wnt7a-mediated presynaptic assembly and is regulated by neuronal activity (Sahores et al., 2010). We therefore investigated whether this receptor also functions postsynaptically. However, Fz5 receptors were not enriched at spines in cultured hippocampal neurons (Figure S4A), and gain and loss of function of Fz5 did not affect spine size or number (Figures S4B–S4D). These data suggest that Fz5 does not mediate the effect of Wnt7a on the postsynaptic side.

With the aim to identify other Wnt7a receptors, we performed a binding assay (Sahores et al., 2010). HEK293 cells expressing the Fz receptor cysteine-rich domains (CRDs), which mediate Wnt binding, were exposed to Wnt7a-hemagglutinin (HA). We found that Wnt7a was bound to cells expressing Fz7-CRD (Figure S5A). Furthermore, endogenous Fz7 receptors were enriched in synaptosome fractions (Figure S5B) from brain lysate and were localized to dendritic spines (in contrast, Fz5 did not localize to these postsynaptic structures) in cultured hippocampal neurons (Figure S5C). These studies identify Fz7 as a potential receptor for Wnt7a on the postsynaptic site.

To determine whether Fz7 mediates Wnt7a function during synaptic plasticity, we performed loss-of-function studies. Three short hairpin RNA (shRNA) clones against Fz7 were validated in normal rat kidney epithelial (NRK) cells and in cultured hippocampal neurons. qPCR and western blot analyses revealed a significant reduction (60%) in the levels of endogenous Fz7 protein (Figure S5D). Fz7 knockdown reduced the number of dendritic spines (Figures 3A and 3B; Figure S5E), and this defect was rescued by expression of shRNA-insensitive Fz7 cDNA (Figure S5E). Fz7 knockdown had no effect on presynaptic assembly (Figure S5F) but blocked the ability of Wnt7a to increase spine number and size (Figures S5G and S5H). Thus, Wnt7a requires Fz7 receptors on the postsynaptic side to regulate spine plasticity.

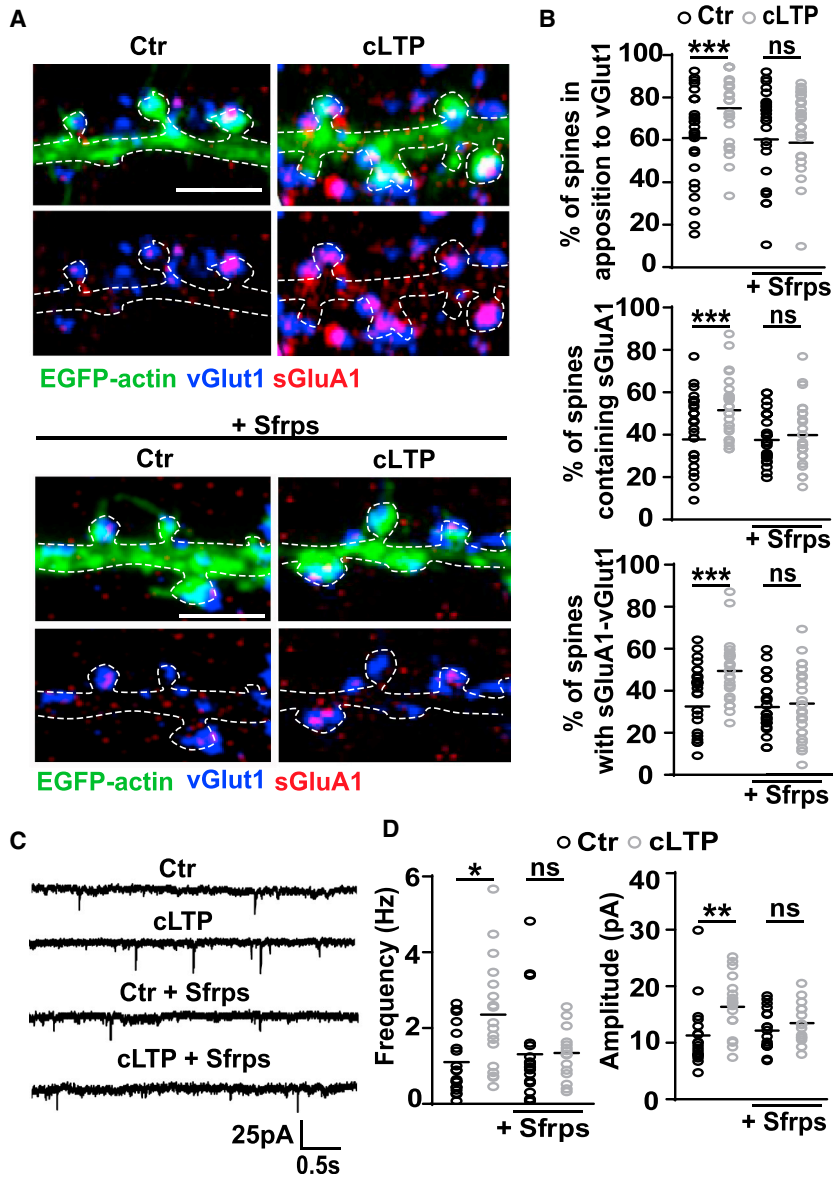

**Figure 2. Wnt Blockade Suppresses Activity-Mediated Synaptic Localization of AMPARs**

(A) Cultured neurons (14 DIV) exposed to control (Ctr) or cLTP conditions, with or without Sfrps. Excitatory presynaptic marker vGlut1 (blue), surface excitatory postsynaptic marker sGluA1 (red), and EGFP-actin (green) (scale bars: 2.5 μm).

(B) Percentage of spines containing sGluA1 and in apposition to vGlut1. Percentage of synapses was determined by the colocalization of vGlut1 and sGluA1. n = 39–52 cells per condition (\*\*\*p < 0.001, ANOVA).

(C) AMPAR-mediated mEPSCs recorded from hippocampal neurons (14 DIV) exposed to control (Ctr) or cLTP conditions in the presence or absence of Sfrps.

(D) mEPSC frequency and amplitude. n = 15–19 cells recorded in each group from 6 independent experiments (\*p < 0.05 and \*\*p < 0.01, ANOVA).

See also Figure S2.

plasticity and AMPAR recruitment to spines during LTP induction.

### Wnt7a Rapidly Increases Spine Size and Postsynaptic AMPAR Localization

Spine growth occurs within minutes after LTP followed by the incorporation of GluA1-containing AMPARs into dendritic spines (Kopeck et al., 2006; Makino and Malinow, 2009; Tanaka and Hirano, 2012; Yang et al., 2008b). To investigate how fast Wnt7a regulates synaptic localization of AMPARs, we performed live imaging of cultured hippocampal neurons expressing monomeric red fluorescent protein (mRFP) (to delineate neuronal morphology) and SEP-GluA1, which increases in fluorescence upon exposure to a neutral pH in the extracellular environment (Perestenko and Henley, 2006). Wnt7a significantly increased spine size within 4 min, followed closely by elevated SEP-GluA1 levels (Figures 4A and 4B). These results are consistent

with our findings that surface levels of endogenous GluA1-containing AMPARs are enriched at dendritic spines 5 min after Wnt7a exposure (Figures S6A and S6B). These effects were specific to Wnt7a, because Wnt5a did not affect endogenous AMPAR localization and spine size (Figures S6C and S6D). Moreover, short-term exposure to Wnt7a did not affect spine number (Figure S6E). In contrast, long-term exposure to Wnt7a (3 hr) affects both spine size and spine number (Figures S5G and S5H) (Ciani et al., 2011). Thus, Wnt7a rapidly increases spine size and GluA1 insertion on dendritic spines comparable to early LTP stages.

Next, we examined the requirement of Fz7 in LTP-dependent spine plasticity and AMPAR localization. cLTP induction failed to promote spine plasticity in Fz7 knockdown neurons compared to scrambled shRNA-expressing neurons (Figures 3A and 3B). cLTP induction did not increase the levels of sGluA1 at dendritic spines in Fz7 knockdown neurons (Figures 3A–3C). We next investigated the impact of Fz7 loss of function in the intact hippocampal circuit. We found that CA1 neurons from organotypic hippocampal cultures (Figure 3D) infected with adeno-associated virus serotype 1 (AAV1)-expressing scrambled shRNA exhibited significant potentiation following a whole-cell pairing protocol as previously described (Barria and Malinow, 2005; Rumpel et al., 2005). In contrast, CA1 neurons expressing Fz7 shRNA did not exhibit potentiation (Figures 3E and 3F). Collectively, these results strongly suggest that Wnt7a-Fz7 signaling is required for hippocampal structural

plasticity and AMPAR recruitment to spines during LTP induction.

Given the rapid effect of Wnt7a on spine growth and AMPAR accumulation, we next investigated the acute effect of Wnt7a on network-driven synaptic strength by examining the amplitude and frequency of spontaneous excitatory postsynaptic currents (sEPSCs) in cultured hippocampal neurons. The frequency of

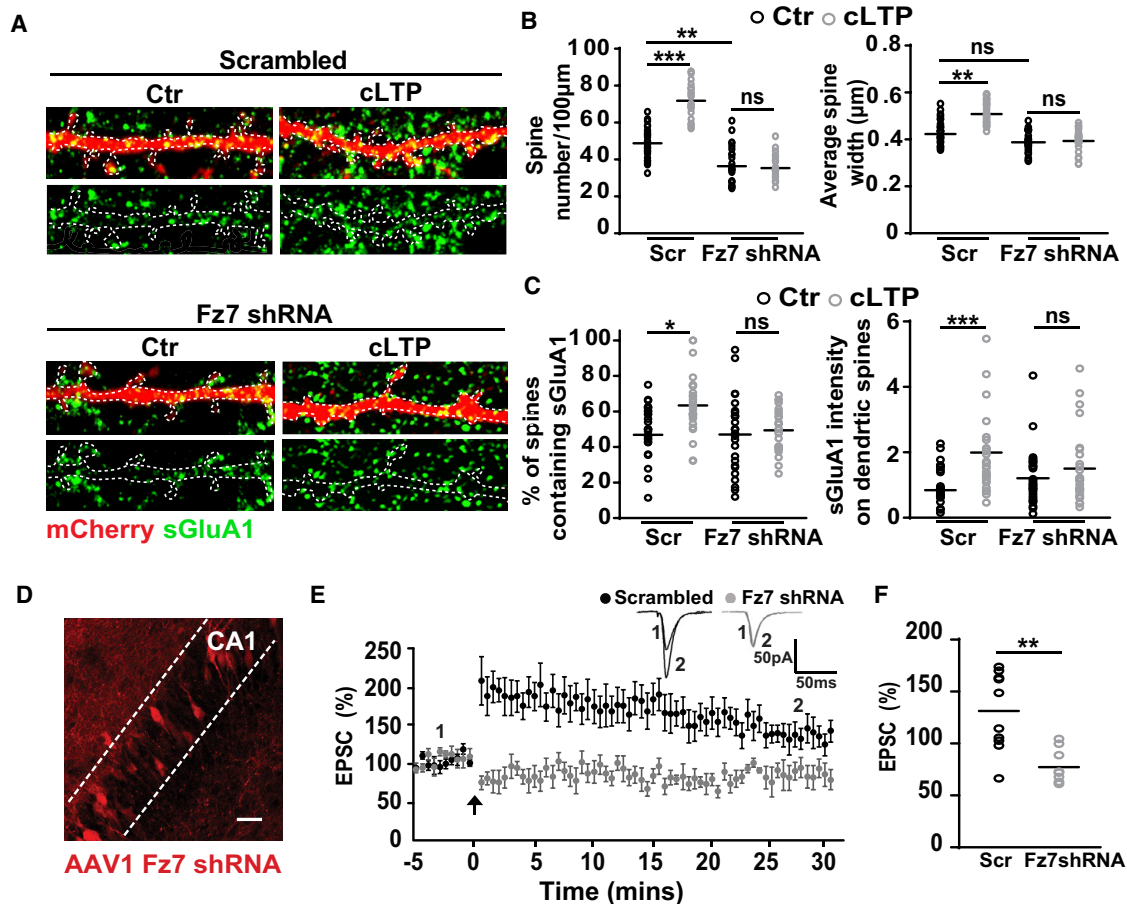

**Figure 3. Fz7 Receptors Are Required for Structural and Functional Plasticity and AMPAR Localization during LTP**

(A) Scrambled or Fz7 shRNA-transfected cultured neurons (14–16 DIV) exposed to control (Ctr) or cLTP conditions. sGluA1 (green) with mCherry-labeled spines (scale bars: 2.5  $\mu$ m).

(B) Spine number and width in neurons exposed to different conditions.  $n = 25\text{--}27$  cells per condition (\*\* $p < 0.01$  and \*\*\* $p < 0.001$ , ANOVA).

(C) Quantification of surface GluA1 levels at dendritic spines.  $n = 25\text{--}27$  cells per condition (\* $p < 0.05$  and \*\*\* $p < 0.001$ , ANOVA).

(D) Example image of an organotypic hippocampal slice infected with AAV1 driving the expression of Fz7 shRNA in the CA1 region (scale bar: 25  $\mu$ m).

(E) Sample traces (insets) and summary LTP graph from whole-cell patched neurons in organotypic slices infected with AAV-expressing scrambled or Fz7 shRNA following a pairing protocol (3 Hz stimulation during depolarization to 0 mV; arrow). Data expressed as mean  $\pm$  SEM.

(F) Percentage of EPSC response 30 min after the pairing protocol (average of last 10 min of recording) in scrambled (Scr) and Fz7 shRNA-infected organotypic slices.  $n = 8\text{--}10$  cultured slices for each group from four independent cultures (\*\* $p < 0.001$ , Student's  $t$  test).

See also [Figures S3–S5](#) and [S7](#).

sEPSCs was unaffected ([Figures 4C](#) and [4D](#)), consistent with no change in spine number after short-term exposure to Wnt7a ([Figure S6E](#)). However, a significant increase in the amplitude of sEPSCs was observed ([Figure 4D](#)). These results demonstrate that Wnt7a rapidly enhances synaptic AMPAR localization and synaptic transmission.

#### Wnt7a Promotes Immobilization of AMPARs at Spines

Single-particle tracking techniques have demonstrated that AMPARs are highly mobile on the extrasynaptic plasma membrane and become relatively immobile at the synapse ([Borgdorff and Choquet, 2002](#); [Opazo et al., 2010](#); [Pettrini et al., 2009](#)). LTP alters the mobility of AMPARs by increasing their lateral diffusion from extrasynaptic sites to the synapse, where they become trapped and less mobile ([Makino and Malinow, 2009](#); [Opazo et al.,](#)

[2010](#)). Because Wnt7a rapidly induced the incorporation of AMPARs into spines ([Figure 4](#)), we examined whether Wnt7a affected the lateral movement of GluA1-containing receptors in cultured neurons using time-lapse fluorescence microscopy of quantum dot-tagged GluA1 (QD-GluA1) ([Figure 5A](#)). The mobility of synaptic QD-GluA1 was slower than that of extrasynaptic QD-GluA1, defined by the diffusion coefficient (D coefficient, a measure of how far and fast the quantum dots [QDs] are moving) in control neurons ([Figures 5B](#) and [5C](#)). At excitatory synapses, these receptors were more confined (indicated by the smaller cell surface area explored in the mean squared displacement [MSD] plot) compared to those located extrasynaptically ([Figure S6F](#)). Exposure to Wnt7a for 10 min reduced the diffusion of synaptic QD-GluA1 further in control cells ([Figure 5D](#); [Figure S6G](#)), which could reflect a decrease in the mobility of existing receptors or

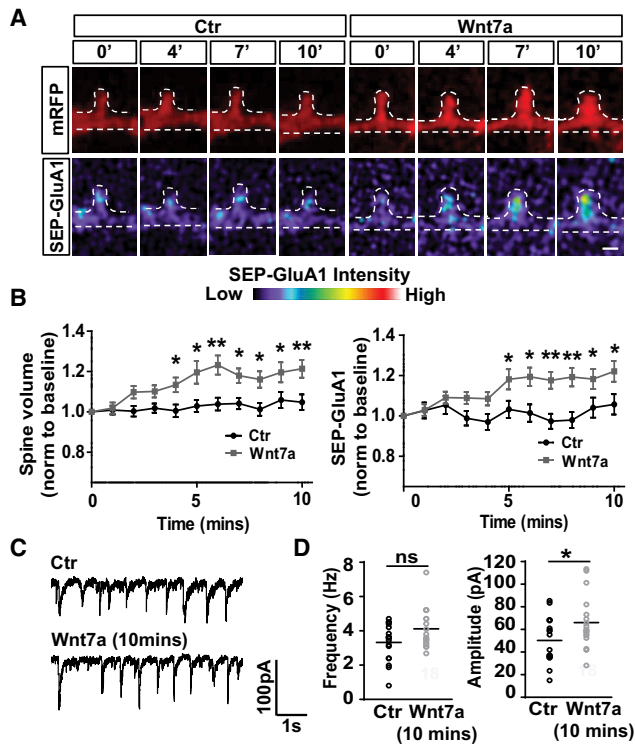

**Figure 4. Wnt7a Rapidly Increases AMPAR Localization on Spines and AMPAR Currents**

(A) mRFP and SEP-GluA1 (pseudo-color) signals in a spine (14 DIV) exposed to control (Ctr) or Wnt7a and imaged over time (scale bar: 1  $\mu$ m). (B) mRFP volume and SEP-GluA1 intensity at different time points, normalized to baseline.  $n = 27\text{--}33$  spines from 7–8 cells ( $*p < 0.05$  and  $**p < 0.01$ , ANOVA with repeated measures). Data expressed as mean  $\pm$  SEM. (C) Spontaneous EPSCs from hippocampal neurons (13–14 DIV) treated with or without Wnt7a for 10 min. (D) Frequency and amplitude of spontaneous EPSC events.  $n = 18$  cells recorded in each group from 5 independent experiments ( $*p < 0.05$ , Student's  $t$  test for EPSC amplitude). See also Figure S6.

an increased incorporation of receptors into the immobile receptor pool at synapses. The distribution of  $D$  coefficients showed that Wnt7a increased the fraction of immobile synaptic QD-GluA1 (Figure 5E). A trend toward increased confinement of synaptic QD-GluA1 in response to Wnt7a was observed (Figure S6F), consistent with our finding that Wnt7a increased the levels of GluA1 at dendritic spines (Figures 4A and 4B; Figures S6A and S6B). Furthermore, Wnt7a increased the diffusion of extrasynaptic QD-GluA1 (velocity of 29,000  $\text{nm}^2/\text{s}$  compared to 27,000  $\text{nm}^2/\text{s}$  in control cells) ( $p < 0.001$ , Kolmogorov-Smirnov test). Altogether, these results suggest that Wnt7a rapidly promotes the recruitment and immobilization of GluA1-containing AMPARs at dendritic spines while increasing the mobility of extrasynaptic AMPARs.

### Wnt7a-Fz7 Signaling Promotes the Extrasynaptic Trafficking of AMPARs through PKA Activation

Phosphorylation of GluA1 at S845 by PKA (Roche et al., 1996) is important for the extrasynaptic surface delivery of AMPARs and

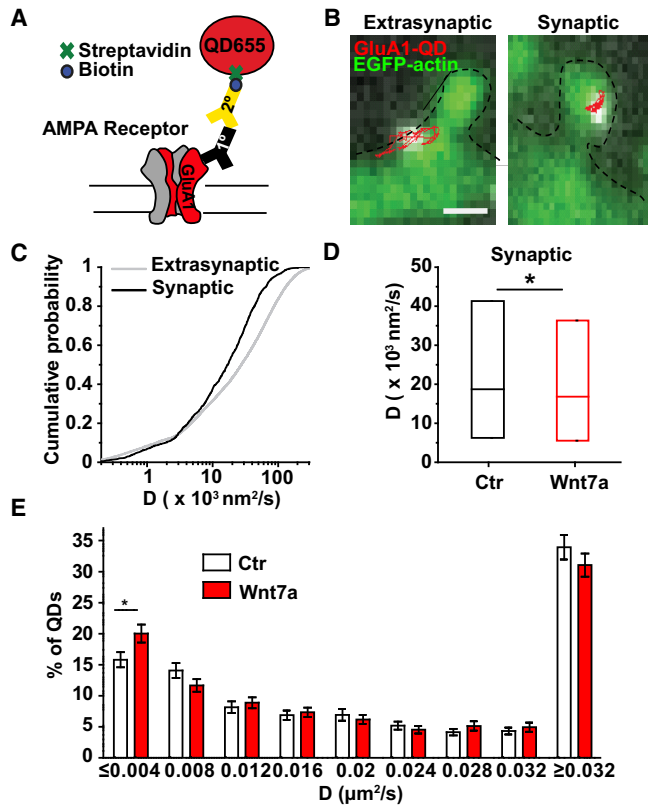

**Figure 5. Wnt7a Promotes the Diffusional Trapping of AMPARs in Dendritic Spines**

(A) Diagram of quantum dot-tagged GluA1 (QD-GluA1). Streptavidin-coupled quantum dots (QDs) recognize biotinylated secondary antibodies bound to GluA1-targeted primary antibodies. (B) Extrasynaptic (left panel) and synaptic (right panel) QD-GluA1 trajectories along the dendrites of hippocampal neurons (13–14 DIV). Spines are visualized with EGFP-actin (scale bar: 1  $\mu$ m). (C) Cumulative probability of diffusion coefficient ( $D$  coefficient) in a log scale between synaptic and extrasynaptic QD-GluA1 in control conditions. (D) Median  $D$  coefficient at the synapse in control (Ctr) and Wnt7a-treated cells (10 min) ( $*p < 0.05$ , Kolmogorov-Smirnov test). (E) Overall distribution of the  $D$  coefficient data shows significant change in the immobile fraction between control (Ctr) and Wnt7a ( $*p < 0.05$ , Student's  $t$  test). Data expressed as mean  $\pm$  SEM. Entire dataset  $n = 1,638$  (control) and 1,409 (Wnt7a) of synaptic trajectories and 12,350 (control) and 10,459 (Wnt7a) of extrasynaptic trajectories from 4 independent experiments. See also Figure S6.

LTP expression (Esteban et al., 2003; He et al., 2009; Man et al., 2007; Oh et al., 2006; Yang et al., 2008a). LTP induction increases phosphorylation at this site within 10 min (Oh et al., 2006; Diering et al., 2016). We therefore investigated whether Wnt7a regulates extrasynaptic AMPAR localization. Time-lapse recordings of cultured neurons expressing SEP-GluA1 demonstrated that Wnt7a rapidly increased the levels of extrasynaptic AMPARs (Figure 6A).

Next, we found that Wnt7a progressively increased the phosphorylation of GluA1 at S845, with a maximum effect after 10–20 min (Figures 6B and 6C). Wnt7a-induced phosphorylation of S845 was blocked in hippocampal neurons infected

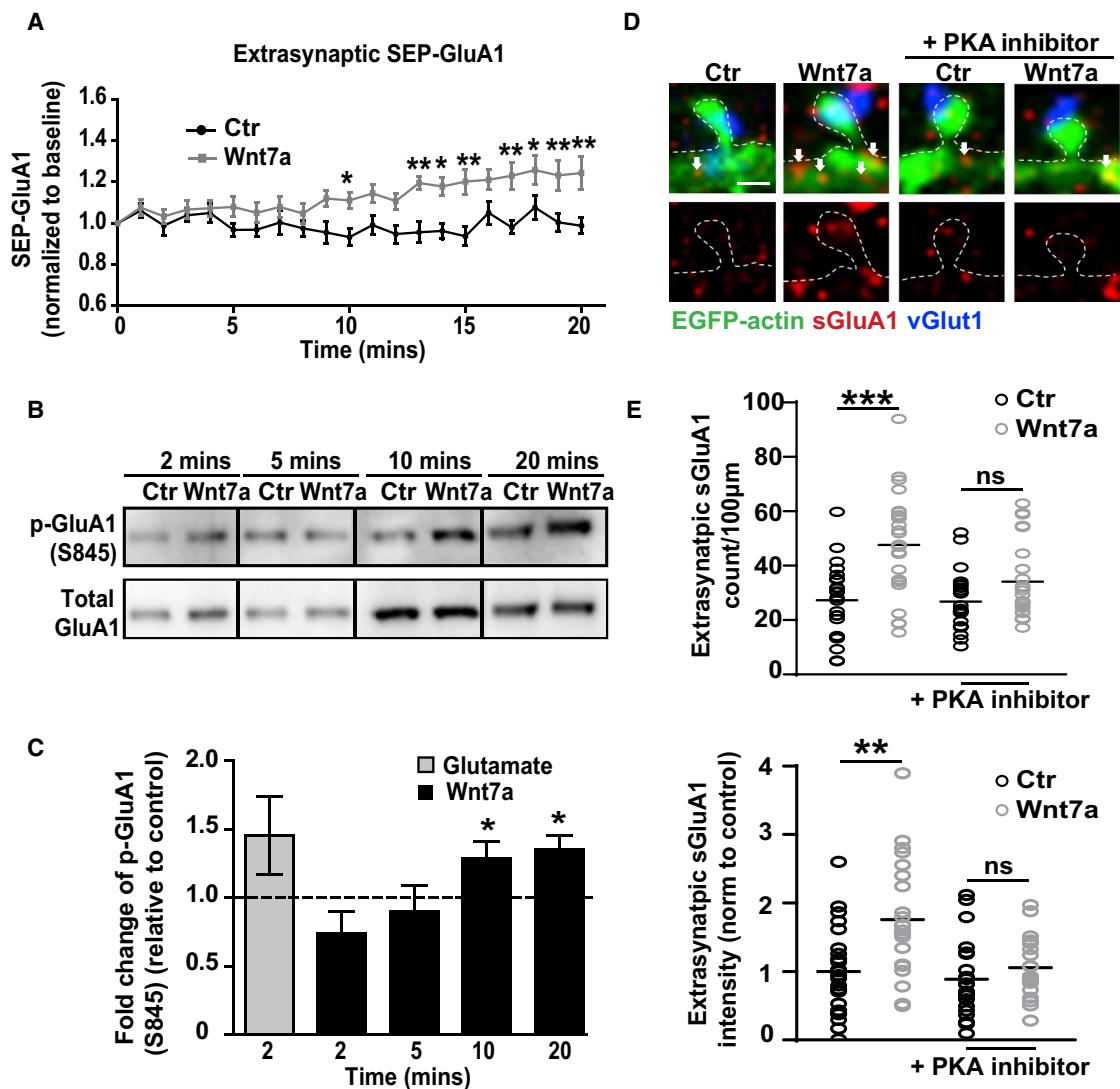

**Figure 6. Wnt7a Signals through PKA to Promote Extrasynaptic Localization of AMPARs**

(A) Extrasynaptic SEP-GluA1 intensity over time in neurons treated with control (Ctr) or Wnt7a, normalized to baseline values.  $n = 17$  dendritic ROIs from 5 cells ( $*p < 0.05$  and  $**p < 0.01$ , ANOVA with repeated measures).

(B) Phosphorylation of GluA1 at S845 (p-GluA1) following 2–20 min of Wnt7a treatment (14 DIV).

(C) p-GluA1 levels normalized to total GluA1 levels. Graphs show fold changes in S845 levels relative to controls (dashed line) over time. Glutamate ( $50 \mu\text{M}$ ) was used as a positive control.  $n = 4$  experiments per dataset ( $*p < 0.05$ , Student's *t* test). Data expressed as mean  $\pm$  SEM.

(D) EGFP-actin-expressing hippocampal neurons (14 DIV) exposed to control (Ctr) or Wnt7a for 20 min with or without the PKA inhibitor PKI (14–22) amide. vGlut1 (blue) and sGluA1 (red); arrows indicate extrasynaptic sGluA1 puncta (scale bar:  $1 \mu\text{m}$ ).

(E) Extrasynaptic sGluA1 puncta normalized to dendritic length, and intensity of extrasynaptic sGluA1 normalized to control.  $n = 23$ – $27$  cells per condition ( $**p < 0.01$  and  $***p < 0.001$ , ANOVA).

See also Figure S7.

with AAV1 Fz7 shRNA compared to cells infected with control scrambled shRNA (Figures S7A and S7B). In addition, phosphorylation of S845 was required for Wnt7a-mediated extrasynaptic AMPAR recruitment, because inhibition of PKA with myristoylated protein kinase inhibitor (PKI) amide (14–22) significantly blocked the recruitment of extrasynaptic surface AMPARs evoked by Wnt7a (Figures 6D and 6E). Collectively, these findings demonstrate that Wnt7a-Fz7 signaling promotes GluA1 phosphorylation at S845 as observed during

early phases of LTP, resulting in increased levels of extrasynaptic AMPARs.

#### Wnt7a, through Fz7 and CaMKII Activation, Induces the Loss of SynGAP from Spines and Activation of the Ras-ERK Pathway

During LTP, CaMKII activation at dendritic spines promotes the surface insertion and trapping of synaptic AMPARs (Esteban et al., 2003; Hayashi et al., 2000; Opazo et al., 2010). We



previously reported that Wnt7a rapidly increases the local activation of CaMKII at dendritic spines and inhibition of CaMKII blocks Wnt7a-mediated increase in spine growth and synaptic strength (Ciani et al., 2011). In agreement with this, Wnt7a promoted the rapid recruitment of AMPARs to dendritic spines through activation of CaMKII (Figure S6H). CaMKII phosphorylates several proteins in the postsynaptic density (PSD) that modulate synaptic AMPAR levels (Huganir and Nicoll, 2013; Lisman et al., 2012). One of these is the SynGAP, which inhibits the Ras-ERK signaling pathway, critical for AMPAR recruitment to spines following LTP induction (Araki et al., 2015; Patterson et al., 2010; Zhu et al., 2002). CaMKII activation leads to the loss of SynGAP from dendritic spines, resulting in increased levels of synaptic AMPARs (Araki et al., 2015). We measured the endogenous levels of SynGAP specifically on small to medium dendritic spines in cultured hippocampal neurons, where Wnt7a rapidly increases CaMKII activity (Ciani et al., 2011). Wnt7a decreases the intensity of SynGAP by ~50% and the percentage of spines containing SynGAP puncta (Figures 7A and 7B). These events were blocked in cells expressing Fz7 shRNA (Figures S7C and S7D), indicating that Fz7 receptors are required for Wnt7a-induced removal of SynGAP from dendritic spines. Consistent with a role for CaMKII, these effects were prevented by autocamtide-2-related inhibitory peptide (AIP), a specific CaMKII inhibitor (Figures 7A and 7B). Furthermore, Wnt7a elevated the levels of phospho-ERK, a marker of ERK pathway activation (Figures 7C and 7D). Altogether, these results demonstrate that Wnt7a-Fz7 signaling induces the loss of SynGAP from dendritic spines in a CaMKII-dependent manner, with the concomitant activation of the Ras-ERK pathway, thereby promoting synaptic AMPAR localization.

## DISCUSSION

Here, we uncovered a role for Wnt-Fz7 signaling in LTP-dependent spine plasticity and synaptic localization of AMPARs. We demonstrated that LTP induction increased Wnt7a/b protein at dendrites and spines. Direct blockade of endogenous Wnts impaired LTP-mediated structural spine plasticity and the synaptic targeting of GluA1-containing AMPARs. We identified Fz7 as the postsynaptic receptor for Wnt7a required for spine plasticity and LTP induction. We also demonstrated that Wnt signaling regulates the membrane localization of AMPARs through PKA-dependent phosphorylation of GluA1 and facilitated the synaptic localization of these receptors by CaMKII-mediated loss of SynGAP at dendritic spines (see model in Figure 7E). Our findings reveal a critical role for Wnts in LTP induction, because these secreted factors trigger downstream signaling events that are required for NMDAR-mediated structural and functional plasticity.

The molecular mechanisms that contribute to the structural and functional plasticity of synapses have been extensively studied. The central role of the neurotransmitter glutamate as the main initiator of LTP-mediated synaptic plasticity is widely recognized; however, the identity and function of secreted molecules that support this role of glutamate is not fully understood. While extracellular signals such as BDNF are recognized as LTP mediators (Zagrebelsky and Korte, 2014), the importance of other extracellular signaling proteins, including Wnts, in LTP-mediated structural and functional plasticity is unclear.

Wnt5a regulates NMDAR-mediated synaptic transmission and LTP expression, but the effect of this Wnt protein is slow, taking approximately 20 min (Cerpa et al., 2011). Similarly, Wnt5a requires 1–2 hr to enhance dendritic spine size and synapse formation in cultured hippocampal neurons and 30 min to regulate spine number (Ramírez et al., 2016). Here, we demonstrate that Wnt5a does not induce fast changes in AMPAR localization or dendritic spine size. Collectively, these findings suggest that Wnt5a may function during later stages of LTP.

Here we discover a unique role for Wnt7a/b at early stages of LTP. HFS of SCs, which induces LTP at CA3-CA1 synapses, specifically increased the levels of endogenous Wnt7a/b protein in the stratum radiatum and is rapidly elevated (5 min) at dendritic spines following cLTP. Given the expression of Wnt7a and Wnt7b at principal neurons in the hippocampus, Wnt7a/b protein may come from presynaptic and/or postsynaptic neurons in the stratum radiatum. Although the mechanisms controlling the rapid accumulation and/or release of Wnt7a/b remain to be elucidated, Wnts could be stored and then released from exosomes at the synapse, as observed at the *Drosophila* NMJ (Budnik et al., 2016; Padamsey et al., 2017). Further studies are required to demonstrate the mechanism by which activity regulates the synaptic accumulation and secretion of Wnts.

Wnt7a, through Fz7 receptors, modulated LTP-associated structural and functional plasticity. Acute blockade of endogenous Wnts with Sfrps suppresses the structural plasticity of dendritic spines and LTP induction and maintenance. This result is consistent with our previous work showing that long-term *in vivo* blockade of endogenous Wnts with Dkk1, another secreted Wnt antagonist, affects LTP (Marzo et al., 2016). Early LTP events depend on the precise regulation of AMPAR content (Henley and Wilkinson, 2016; Huganir and Nicoll, 2013; Temkin et al., 2017). Consistently, Wnt7a rapidly increased the accumulation of AMPARs at dendritic spines, thereby elevating AMPAR-mediated excitatory postsynaptic current (EPSC) amplitude. Using live imaging of SEP-GluA1-expressing neurons and single-particle tracking, we showed that Wnt7a rapidly increased spine size and synaptic AMPAR levels while increasing the number of immobile synaptic AMPARs. The timing of these events is similar to those observed after LTP induction (Kopeck et al., 2006; Makino and Malinow, 2009; Tanaka and Hirano, 2012; Yang et al., 2008b). We demonstrated that Wnt7a specifically regulated spine plasticity and AMPAR localization through Fz7 receptors, which were located postsynaptically. Fz7 loss of function prevented cLTP-induced AMPAR accumulation at the surface and inhibits synaptic potentiation following a whole-cell LTP pairing protocol. Thus, our studies delineate a pathway modulating structural and functional plasticity through the Wnt7a-Fz7 signaling cascade.

What is the mechanism by which Wnt7a-Fz7 signaling enhances AMPAR localization and synaptic strength? Following induction of LTP, the number of AMPARs rapidly increases at extrasynaptic sites (Makino and Malinow, 2009; Yang et al., 2008a) through PKA-dependent phosphorylation of GluA1 at S845 (He et al., 2009; Man et al., 2007; Oh et al., 2006; Yang et al., 2008a). Although this phosphorylation site is not required for direct synaptic AMPAR incorporation (Esteban et al., 2003), extrasynaptic receptors can be recruited to the synapse through lateral diffusion

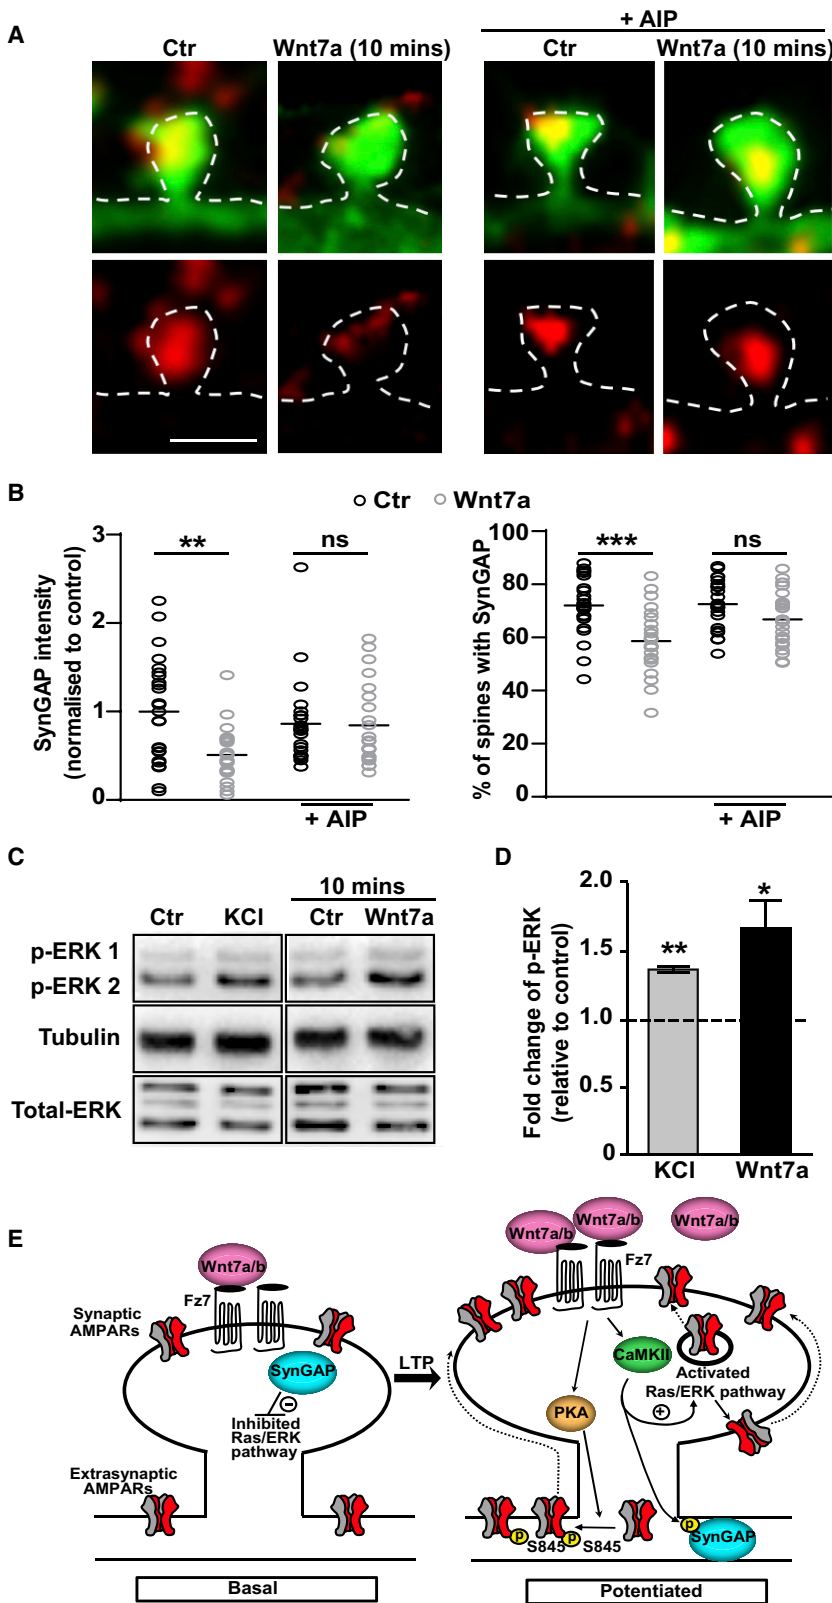

**Figure 7. Wnt7a-Mediated Reduction of SynGAP in Spines and Activation of the Ras-ERK Pathway**

(A) Spines from EGFP-actin-expressing neurons (14 DIV) with endogenous SynGAP (red) exposed to control (Ctr) or Wnt7a for 10 min with or without the CaMKII inhibitor AIP (scale bar: 1  $\mu$ m).

(B) SynGAP intensity within small to medium spines normalized to control levels, and the percentage of spines containing SynGAP.  $n = 25$  cells per condition (\*\* $p < 0.01$  and \*\*\* $p < 0.001$ , ANOVA).

(C) Phosphorylated ERK (p-ERK1 and p-ERK2) 10 min after exposure to Wnt7a (14 DIV). Tubulin was used as a loading control.

(D) Quantification of p-ERK levels normalized to total ERK levels. Graphs show fold change in p-ERK levels relative to controls (dashed line). Potassium chloride (KCl; 60 mM) was used as a positive control (\* $p < 0.05$  and \*\* $p < 0.01$ , Student's  $t$  test). Data expressed as mean  $\pm$  SEM.

(E) Proposed model for the mechanism by which Wnt7a-Fz7 signaling regulates LTP-induced AMPAR localization and spine growth. LTP induction increases endogenous Wnt7a/b levels at synapses. Wnt7a/b binding to Fz7 activates PKA and CaMKII, resulting in increased levels of extrasynaptic and synaptic AMPARs through the loss of SynGAP at synapses. Dashed arrows represent potential mechanisms.

See also [Figures S6](#) and [S7](#).

in the surface membrane (Bassani et al., 2013; Opazo and Choquet, 2011). A study showed that the rapid recruitment of AMPARs to synapses from an extrasynaptic pool through lateral diffusion and activity-dependent trapping of these receptors at the PSD is imperative for LTP induction (Penn et al., 2017). Moreover, the replenishment of the extracellular pool of AMPARs is through exocytosis and is required to maintain LTP (Penn et al., 2017). Here, we demonstrate that Wnt7a through Fz7 increased PKA-mediated phosphorylation of the GluA1 subunit at S845 and promoted the localization of AMPARs at extrasynaptic sites within 10–20 min. These findings, together with our time-lapse recordings and single-particle tracking data, are consistent with the model proposed by Penn et al. (2017). Thus, our results suggest that Wnts could play an important role in AMPAR synaptic recruitment at early and later stages of LTP.

Activation of CaMKII is also required for the localization and confinement of AMPARs at synaptic sites (Esteban et al., 2003; Herring and Nicoll, 2016; Hayashi et al., 2000; Opazo et al., 2010). Although CaMKII phosphorylates AMPARs at S831, this post-translational modification is not required for AMPAR synaptic localization (Hayashi et al., 2000; Opazo et al., 2010). In contrast, CaMKII phosphorylates SynGAP, a Ras-GTPase that inhibits ERK signaling (Rumbaugh et al., 2006), resulting in the loss of this protein from dendritic spines with the concomitant increase in AMPARs (Araki et al., 2015). Consistent with this model, and in contrast to results obtained with Wnt5a (Codoedo et al., 2015), we found that Wnt7a through Fz7 rapidly promotes the loss of SynGAP from spines in a CaMKII-dependent manner, resulting in the activation of the Ras-ERK pathway. Thus, our findings suggest that Wnt7a-CaMKII signaling regulates the synaptic localization of AMPARs through rapid changes in SynGAP localization.

In summary, our findings reveal a crucial role for Wnt7a-Fz7 signaling in LTP-mediated synaptic plasticity. We demonstrate that endogenous Wnts in the hippocampus are required for LTP induction and localization of AMPARs to dendritic spines by modulating signaling pathways implicated in LTP. Thus, our results identify a mechanism that modulates the initial stages of LTP through Wnt-Fz signaling.

## EXPERIMENTAL PROCEDURES

### Cultures, Cell Transfection, and Constructs

All procedures involving animals were conducted according to the Animals Scientific Procedures Act UK (1986) and in compliance with the ethical standards at University College London (UCL). Rat primary hippocampal cultures were prepared as described previously (Dotti et al., 1988) and maintained for 13–14 days *in vitro* (DIV). Neurons were transfected using calcium phosphate with EGFP-actin, mRFP, or mCherry to visualize dendritic spines or expressed SEP-tagged GluA1 construct (SEP-GluA1) to examine AMPAR trafficking to the cell surface. To investigate the localization and function of Fz (Fz5 and Fz7) receptors, hippocampal cultures were transfected using calcium phosphate with scrambled and shRNA or with full-length receptor. To rescue the phenotype of Fz7 shRNA, hippocampal neurons were transfected with a plasmid containing both Fz7 shRNA and Fz7-insensitive cDNA. Neuronal health was morphologically evaluated before experimental measurements were conducted. Organotypic hippocampal slice cultures were prepared as previously described from postnatal day (P) 6 rats (De Simoni and Yu, 2006). See [Supplemental Experimental Procedures](#) for further information.

### Chemical LTP

LTP was induced in cultured hippocampal neurons with a glycine-mediated form of cLTP as previously described (Fortin et al., 2010; Stamatakou et al., 2013). To block Wnts, a combination of recombinant Sfrp1 (2.5  $\mu\text{g}/\text{mL}$ ; R&D Systems, Abingdon, UK) and Sfrp3 (250 ng/mL; R&D Systems) was used throughout the induction of cLTP and during the incubation with control solution. See [Supplemental Experimental Procedures](#) for more information.

### Immunofluorescence, Image Acquisition, and Analyses

Hippocampal neurons were fixed with 4% paraformaldehyde (PFA)/4% sucrose in PBS for 20 min at room temperature, permeabilized with 0.05% Triton, blocked with 5% BSA, and then incubated with primary antibodies overnight at 4°C. For surface AMPAR staining, live cells were incubated with each antibody for 10–15 min at 37°C before fixation. Images were captured on an Olympus FV1000 inverted confocal microscope. For each experiment, 8–12 images of cells were taken per condition and analyzed using Volocity software (Improvision, Llantrisant, UK). Dendritic spine morphology was measured manually. For every EGFP-actin/mCherry-expressing cell, 3–4 dendrites ( $\sim 50$ – $100 \mu\text{m}$  in length each) containing roughly 100 spines were cropped from maximum projections. Spine width was quantified by placing the line tool (in Volocity software) over the maximum spine head width, and the number of spines was counted and normalized to the length of the dendrite. See [Supplemental Experimental Procedures](#) for more details.

### Electrophysiology

AMPA-mediated mEPSCs and sEPSCs were recorded from hippocampal neurons (250 cells/ $\text{mm}^2$ ) and voltage-clamped at  $-60 \text{ mV}$  in the whole-cell configuration using borosilicate glass patch electrodes. NMDA/AMPA ratio experiments and input-output experiments were performed in acute transverse hippocampal slices (300  $\mu\text{m}$ ) from P28 rats in recording solution. NMDAR EPSCs were recorded at  $+40 \text{ mV}$ , and AMPAR EPSCs were recorded at  $-40 \text{ mV}$ . Recording glass microelectrodes were positioned in the CA1 pyramidal cell layer, while concentric bipolar stimulating electrodes were placed in SC afferent fibers. The peak averaged NMDAR EPSCs were divided by the averaged AMPAR EPSCs. See [Supplemental Experimental Procedures](#) for more details.

For fEPSP recordings, glass microelectrodes were positioned in the stratum radiatum of the CA1 region, while concentric bipolar stimulating electrodes were placed in SC afferent fibers to record fEPSPs. Paired pulse stimuli were given 50 ms apart every 10 s, with a stimulation strength set to approximately 50% of the strength giving a maximal response. Following a stable 20-min baseline recording ( $<10\%$  change in fEPSP slope), LTP was induced by HFS (a single train of 100 stimuli at 100 Hz), and fEPSPs were monitored for 1 hr. To block Wnts, Sfrp3 (250 ng/mL) was applied 10 min before HFS and present during LTP. Pairing LTP experiments were performed in organotypic hippocampal slices (9–16 DIV) infected with AAV1-expressing scrambled or Fz7 shRNA constructs. Slices were continuously perfused at room temperature with oxygenated (95%  $\text{O}_2$ /5%  $\text{CO}_2$ ) recording solution. Synaptic responses were evoked with concentric bipolar stimulating electrodes placed in SC afferent fibers (single-voltage pulses of 200  $\mu\text{s}$ ). Pairing LTP was induced in CA1 neurons by pairing 3 Hz presynaptic stimulation of the SCs with 0 mV postsynaptic depolarization. See [Supplemental Experimental Procedures](#) for further information.

### Live Imaging of SEP-GluA1 and Analyses

Time-lapse experiments of SEP-GluA1 were performed on an Olympus FV1000 inverted confocal microscope using a 60 $\times$  oil-immersion objective (numerical aperture [NA] = 1.40) with a temperature-controlled chamber maintained at 37°C in HEPES buffered solution. The z stacks ( $\sim 10$  frames) were acquired every minute for at least 20 min. Data were analyzed on the projected z stack using ImageJ software from manually selected regions of interest (ROIs). See [Supplemental Experimental Procedures](#) for more details.

### Single-Particle Tracking and Quantitative Analyses of Lateral Diffusion

Single-particle tracking and analysis of QD655-tagged AMPARs was performed as previously described (Hannan et al., 2016). See [Supplemental Experimental Procedures](#) for details.

### Statistical Analyses

All data are represented as mean in aligned dot plots unless otherwise stated. Data were obtained from 3 independent experiments unless otherwise stated in the figure legends. We assessed our data for normality using Shapiro-Wilk or Kolmogorov-Smirnov tests. Normally distributed data were analyzed using Student's unpaired or paired (western blots) t test, one-way and two-way ANOVA with Tukey's post hoc test, or two-way ANOVA with repeated measures. Mann-Whitney, Kruskal-Wallis, and Kolmogorov-Smirnov tests were used for non-parametric data. Statistical significance was accepted as \*  $p < 0.05$ , \*\*  $p < 0.01$ , and \*\*\*  $p < 0.001$ , and non-significant data were indicated as NS.

### SUPPLEMENTAL INFORMATION

Supplemental Information includes Supplemental Experimental Procedures and seven figures and can be found with this article online at <https://doi.org/10.1016/j.celrep.2018.03.119>.

### ACKNOWLEDGMENTS

We thank Prof. Jeremy Henley for the SEP constructs and members of our labs for insightful discussions on the data and comments on our manuscript. The MRC (MR/M024083/1, MR/G0802241/1, and MR/J013374/1), Alzheimer's Research UK (ARUK-PG2012-12), and the Wellcome Trust (089013/A/09/Z) supported our work.

### AUTHOR CONTRIBUTIONS

P.C.S. conceived the overall project and provided the funding. A.G. contributed to the analyses and design of the electrophysiology experiments. F.M. performed the cell biology, live imaging, single-particle tracking, and electrophysiology experiments. A.M. was involved in the design and execution of single-cell LTP experiments in brain slices. A.B. and L.C. performed biochemical and cell biology experiments. S.S. and G.A.W. performed cell biology experiments. E.P. performed biochemical experiments. S.H. and T.G.S. contributed to the single-particle tracking experiments. All authors participated in the design of the experiments, interpretation of data, and writing of the manuscript.

### DECLARATION OF INTERESTS

The authors declare no competing interests.

Received: September 15, 2017

Revised: February 16, 2018

Accepted: March 26, 2018

Published: April 24, 2018

### REFERENCES

Araki, Y., Zeng, M., Zhang, M., and Huganir, R.L. (2015). Rapid dispersion of SynGAP from synaptic spines triggers AMPA receptor insertion and spine enlargement during LTP. *Neuron* 85, 173–189.

Ataman, B., Ashley, J., Gorczyca, M., Ramachandran, P., Fouquet, W., Sigrist, S.J., and Budnik, V. (2008). Rapid activity-dependent modifications in synaptic structure and function require bidirectional Wnt signaling. *Neuron* 57, 705–718.

Barria, A., and Malinow, R. (2005). NMDA receptor subunit composition controls synaptic plasticity by regulating binding to CaMKII. *Neuron* 48, 289–301.

Bassani, S., Folci, A., Zapata, J., and Passafaro, M. (2013). AMPAR trafficking in synapse maturation and plasticity. *Cell. Mol. Life Sci.* 70, 4411–4430.

Borgdorff, A.J., and Choquet, D. (2002). Regulation of AMPA receptor lateral movements. *Nature* 417, 649–653.

Budnik, V., and Salinas, P.C. (2011). Wnt signaling during synaptic development and plasticity. *Curr. Opin. Neurobiol.* 21, 151–159.

Budnik, V., Ruiz-Cañada, C., and Wendler, F. (2016). Extracellular vesicles round off communication in the nervous system. *Nat. Rev. Neurosci.* 17, 160–172.

Caldeira, M.V., Melo, C.V., Pereira, D.B., Carvalho, R., Correia, S.S., Backos, D.S., Carvalho, A.L., Esteban, J.A., and Duarte, C.B. (2007). Brain-derived neurotrophic factor regulates the expression and synaptic delivery of alpha-amino-3-hydroxy-5-methyl-4-isoxazole propionic acid receptor subunits in hippocampal neurons. *J. Biol. Chem.* 282, 12619–12628.

Castrén, E., Pitkänen, M., Sirviö, J., Parsadanian, A., Lindholm, D., Thoenen, H., and Riekkinen, P.J. (1993). The induction of LTP increases BDNF and NGF mRNA but decreases NT-3 mRNA in the dentate gyrus. *Neuroreport* 4, 895–898.

Cerpa, W., Godoy, J.A., Alfaro, I., Fariás, G.G., Metcalfe, M.J., Fuentealba, R., Bonansco, C., and Inestrosa, N.C. (2008). Wnt-7a modulates the synaptic vesicle cycle and synaptic transmission in hippocampal neurons. *J. Biol. Chem.* 283, 5918–5927.

Cerpa, W., Gambrell, A., Inestrosa, N.C., and Barria, A. (2011). Regulation of NMDA-receptor synaptic transmission by Wnt signaling. *J. Neurosci.* 31, 9466–9471.

Cerpa, W., Latorre-Esteves, E., and Barria, A. (2015). RoR2 functions as a non-canonical Wnt receptor that regulates NMDAR-mediated synaptic transmission. *Proc. Natl. Acad. Sci. USA* 112, 4797–4802.

Chen, J., Park, C.S., and Tang, S.J. (2006). Activity-dependent synaptic Wnt release regulates hippocampal long term potentiation. *J. Biol. Chem.* 281, 11910–11916.

Ciani, L., Boyle, K.A., Dickins, E., Sahores, M., Anane, D., Lopes, D.M., Gibb, A.J., and Salinas, P.C. (2011). Wnt7a signaling promotes dendritic spine growth and synaptic strength through  $Ca^{2+}$ /Calmodulin-dependent protein kinase II. *Proc. Natl. Acad. Sci. USA* 108, 10732–10737.

Ciani, L., Marzo, A., Boyle, K., Stamatakou, E., Lopes, D.M., Anane, D., McLeod, F., Rosso, S.B., Gibb, A., and Salinas, P.C. (2015). Wnt signalling tunes neurotransmitter release by directly targeting Synaptotagmin-1. *Nat. Commun.* 6, 8302.

Codocedo, J.F., Montecinos-Oliva, C., and Inestrosa, N.C. (2015). Wnt-related SynGAP1 is a neuroprotective factor of glutamatergic synapses against A $\beta$  oligomers. *Front. Cell. Neurosci.* 9, 227.

De Roo, M., Klausner, P., Garcia, P.M., Poglia, L., and Muller, D. (2008). Spine dynamics and synapse remodeling during LTP and memory processes. *Prog. Brain Res.* 169, 199–207.

De Simoni, A., and Yu, L.M. (2006). Preparation of organotypic hippocampal slice cultures: interface method. *Nat. Protoc.* 1, 1439–1445.

Dickins, E.M., and Salinas, P.C. (2013). Wnts in action: from synapse formation to synaptic maintenance. *Front. Cell. Neurosci.* 7, 162.

Diering, G.H., Heo, S., Hussain, N.K., Liu, B., and Huganir, R.L. (2016). Extensive phosphorylation of AMPA receptors in neurons. *Proc. Natl. Acad. Sci. USA* 113, E4920–E4927.

Dotti, C.G., Sullivan, C.A., and Banker, G.A. (1988). The establishment of polarity by hippocampal neurons in culture. *J. Neurosci.* 8, 1454–1468.

Esteban, J.A., Shi, S.H., Wilson, C., Nuriya, M., Huganir, R.L., and Malinow, R. (2003). PKA phosphorylation of AMPA receptor subunits controls synaptic trafficking underlying plasticity. *Nat. Neurosci.* 6, 136–143.

Fortin, D.A., Davare, M.A., Srivastava, T., Brady, J.D., Nygaard, S., Derkach, V.A., and Soderling, T.R. (2010). Long-term potentiation-dependent spine enlargement requires synaptic  $Ca^{2+}$ -permeable AMPA receptors recruited by CaM-kinase I. *J. Neurosci.* 30, 11565–11575.

Gogolla, N., Galimberti, I., Deguchi, Y., and Caroni, P. (2009). Wnt signaling mediates experience-related regulation of synapse numbers and mossy fiber connectivities in the adult hippocampus. *Neuron* 62, 510–525.

Hall, A.C., Lucas, F.R., and Salinas, P.C. (2000). Axonal remodeling and synaptic differentiation in the cerebellum is regulated by WNT-7a signaling. *Cell* 100, 525–535.

Hannan, S., Gerrow, K., Triller, A., and Smart, T.G. (2016). Phospho-dependent accumulation of GABABRs at presynaptic terminals after NMDAR activation. *Cell Rep.* 16, 1962–1973.

Harward, S.C., Hedrick, N.G., Hall, C.E., Parra-Bueno, P., Milner, T.A., Pan, E., Laviv, T., Hempstead, B.L., Yasuda, R., and McNamara, J.O. (2016). Autocrine BDNF-TrkB signalling within a single dendritic spine. *Nature* 538, 99–103.

- Hayashi, Y., Shi, S.H., Esteban, J.A., Piccini, A., Poncer, J.C., and Malinow, R. (2000). Driving AMPA receptors into synapses by LTP and CaMKII: requirement for GluR1 and PDZ domain interaction. *Science* 287, 2262–2267.
- He, K., Song, L., Cummings, L.W., Goldman, J., Hugarir, R.L., and Lee, H.K. (2009). Stabilization of Ca<sup>2+</sup>-permeable AMPA receptors at perisynaptic sites by GluR1-S845 phosphorylation. *Proc. Natl. Acad. Sci. USA* 106, 20033–20038.
- Henley, J.M., and Wilkinson, K.A. (2016). Synaptic AMPA receptor composition in development, plasticity and disease. *Nat. Rev. Neurosci.* 17, 337–350.
- Herring, B.E., and Nicoll, R.A. (2016). Long-term potentiation: from CaMKII to AMPA receptor trafficking. *Annu. Rev. Physiol.* 78, 351–365.
- Hugarir, R.L., and Nicoll, R.A. (2013). AMPARs and synaptic plasticity: the last 25 years. *Neuron* 80, 704–717.
- Ivanova, O.Y., Dobryakova, Y.V., Salozhin, S.V., Aniol, V.A., Onufriev, M.V., Gulyaeva, N.V., and Markevich, V.A. (2017). Lentiviral modulation of Wnt/ $\beta$ -catenin signaling affects *in vivo* LTP. *Cell. Mol. Neurobiol.* 37, 1227–1241.
- Kasai, H., Fukuda, M., Watanabe, S., Hayashi-Takagi, A., and Noguchi, J. (2010). Structural dynamics of dendritic spines in memory and cognition. *Trends Neurosci.* 33, 121–129.
- Kopec, C.D., Li, B., Wei, W., Boehm, J., and Malinow, R. (2006). Glutamate receptor exocytosis and spine enlargement during chemically induced long-term potentiation. *J. Neurosci.* 26, 2000–2009.
- Li, Y., Li, B., Wan, X., Zhang, W., Zhong, L., and Tang, S.J. (2012). NMDA receptor activation stimulates transcription-independent rapid wnt5a protein synthesis via the MAPK signaling pathway. *Mol. Brain* 5, 1.
- Lisman, J., Yasuda, R., and Raghavachari, S. (2012). Mechanisms of CaMKII action in long-term potentiation. *Nat. Rev. Neurosci.* 13, 169–182.
- Lu, W., Man, H., Ju, W., Trimble, W.S., MacDonald, J.F., and Wang, Y.T. (2001). Activation of synaptic NMDA receptors induces membrane insertion of new AMPA receptors and LTP in cultured hippocampal neurons. *Neuron* 29, 243–254.
- Makino, H., and Malinow, R. (2009). AMPA receptor incorporation into synapses during LTP: the role of lateral movement and exocytosis. *Neuron* 64, 381–390.
- Malenka, R.C., and Bear, M.F. (2004). LTP and LTD: an embarrassment of riches. *Neuron* 44, 5–21.
- Man, H.Y., Sekine-Aizawa, Y., and Hugarir, R.L. (2007). Regulation of alpha-amino-3-hydroxy-5-methyl-4-isoxazolepropionic acid receptor trafficking through PKA phosphorylation of the Glu receptor 1 subunit. *Proc. Natl. Acad. Sci. USA* 104, 3579–3584.
- Marzo, A., Galli, S., Lopes, D., McLeod, F., Podpolny, M., Segovia-Roldan, M., Ciani, L., Purro, S., Cacucci, F., Gibb, A., and Salinas, P.C. (2016). Reversal of synapse degeneration by restoring Wnt signaling in the adult hippocampus. *Curr. Biol.* 26, 2551–2561.
- Matsuzaki, M., Honkura, N., Ellis-Davies, G.C., and Kasai, H. (2004). Structural basis of long-term potentiation in single dendritic spines. *Nature* 429, 761–766.
- McQuate, A., Latorre-Esteves, E., and Barria, A. (2017). A Wnt/calcium signaling cascade regulates neuronal excitability and trafficking of NMDARs. *Cell Rep.* 21, 60–69.
- Oh, M.C., Derkach, V.A., Guire, E.S., and Soderling, T.R. (2006). Extrasynaptic membrane trafficking regulated by GluR1 serine 845 phosphorylation primes AMPA receptors for long-term potentiation. *J. Biol. Chem.* 281, 752–758.
- Opazo, P., and Choquet, D. (2011). A three-step model for the synaptic recruitment of AMPA receptors. *Mol. Cell. Neurosci.* 46, 1–8.
- Opazo, P., Labrecque, S., Tigaret, C.M., Frouin, A., Wiseman, P.W., De Koninck, P., and Choquet, D. (2010). CaMKII triggers the diffusional trapping of surface AMPARs through phosphorylation of stargazin. *Neuron* 67, 239–252.
- Padamsey, Z., McGuinness, L., Bardo, S.J., Reinhart, M., Tong, R., Hedegaard, A., Hart, M.L., and Emptage, N.J. (2017). Activity-dependent exocytosis of lysosomes regulates the structural plasticity of dendritic spines. *Neuron* 93, 132–146.
- Patterson, M.A., Szatmari, E.M., and Yasuda, R. (2010). AMPA receptors are exocytosed in stimulated spines and adjacent dendrites in a Ras-ERK-dependent manner during long-term potentiation. *Proc. Natl. Acad. Sci. USA* 107, 15951–15956.
- Penn, A.C., Zhang, C.L., Georges, F., Royer, L., Breillat, C., Hosi, E., Petersen, J.D., Humeau, Y., and Choquet, D. (2017). Hippocampal LTP and contextual learning require surface diffusion of AMPA receptors. *Nature* 549, 384–388.
- Perestenko, P.V., and Henley, J.M. (2006). Visualization of AMPAR trafficking and surface expression. In *The Dynamic Synapse: Molecular Methods in Ionotropic Receptor Biology*, J.T. Kittler and S.J. Moss, eds. (CRC Press/Taylor & Francis).
- Petrini, E.M., Lu, J., Cognet, L., Lounis, B., Ehlers, M.D., and Choquet, D. (2009). Endocytic trafficking and recycling maintain a pool of mobile surface AMPA receptors required for synaptic potentiation. *Neuron* 63, 92–105.
- Ramírez, V.T., Ramos-Fernández, E., Henríquez, J.P., Lorenzo, A., and Inestrosa, N.C. (2016). Wnt-5a/Frizzled9 receptor signaling through the G $\alpha$ -G $\beta$  $\gamma$  complex regulates dendritic spine formation. *J. Biol. Chem.* 291, 19092–19107.
- Roche, K.W., O'Brien, R.J., Mammen, A.L., Bernhardt, J., and Hugarir, R.L. (1996). Characterization of multiple phosphorylation sites on the AMPA receptor GluR1 subunit. *Neuron* 16, 1179–1188.
- Rosso, S.B., Sussman, D., Wynshaw-Boris, A., and Salinas, P.C. (2005). Wnt signaling through Dishevelled, Rac and JNK regulates dendritic development. *Nat. Neurosci.* 8, 34–42.
- Rumbaugh, G., Adams, J.P., Kim, J.H., and Hugarir, R.L. (2006). SynGAP regulates synaptic strength and mitogen-activated protein kinases in cultured neurons. *Proc. Natl. Acad. Sci. USA* 103, 4344–4351.
- Rumpel, S., LeDoux, J., Zador, A., and Malinow, R. (2005). Postsynaptic receptor trafficking underlying a form of associative learning. *Science* 308, 83–88.
- Sahores, M., Gibb, A., and Salinas, P.C. (2010). Frizzled-5, a receptor for the synaptic organizer Wnt7a, regulates activity-mediated synaptogenesis. *Development* 137, 2215–2225.
- Shi, S.H., Hayashi, Y., Petralia, R.S., Zaman, S.H., Wenthold, R.J., Svoboda, K., and Malinow, R. (1999). Rapid spine delivery and redistribution of AMPA receptors after synaptic NMDA receptor activation. *Science* 284, 1811–1816.
- Stamatoukou, E., Marzo, A., Gibb, A., and Salinas, P.C. (2013). Activity-dependent spine morphogenesis: a role for the actin-capping protein Eps8. *J. Neurosci.* 33, 2661–2670.
- Tanaka, H., and Hirano, T. (2012). Visualization of subunit-specific delivery of glutamate receptors to postsynaptic membrane during hippocampal long-term potentiation. *Cell Rep.* 1, 291–298.
- Tanaka, J., Horiike, Y., Matsuzaki, M., Miyazaki, T., Ellis-Davies, G.C., and Kasai, H. (2008). Protein synthesis and neurotrophin-dependent structural plasticity of single dendritic spines. *Science* 319, 1683–1687.
- Temkin, P., Morishita, W., Goswami, D., Arendt, K., Chen, L., and Malenka, R. (2017). The retromer supports AMPA receptor trafficking during LTP. *Neuron* 94, 74–82.
- Turrigiano, G.G., Leslie, K.R., Desai, N.S., Rutherford, L.C., and Nelson, S.B. (1998). Activity-dependent scaling of quantal amplitude in neocortical neurons. *Nature* 391, 892–896.
- Verpelli, C., Piccoli, G., Zibetti, C., Zanchi, A., Gardoni, F., Huang, K., Brambilla, D., Di Luca, M., Battaglioli, E., and Sala, C. (2010). Synaptic activity controls dendritic spine morphology by modulating eEF2-dependent BDNF synthesis. *J. Neurosci.* 30, 5830–5842.
- Wayman, G.A., Impey, S., Marks, D., Saneyoshi, T., Grant, W.F., Derkach, V., and Soderling, T.R. (2006). Activity-dependent dendritic arborization mediated by CaM-kinase I activation and enhanced CREB-dependent transcription of Wnt-2. *Neuron* 50, 897–909.
- Yang, Y., Wang, X.B., Frerking, M., and Zhou, Q. (2008a). Delivery of AMPA receptors to perisynaptic sites precedes the full expression of long-term potentiation. *Proc. Natl. Acad. Sci. USA* 105, 11388–11393.
- Yang, Y., Wang, X.B., Frerking, M., and Zhou, Q. (2008b). Spine expansion and stabilization associated with long-term potentiation. *J. Neurosci.* 28, 5740–5751.
- Zagrebelsky, M., and Korte, M. (2014). Form follows function: BDNF and its involvement in sculpting the function and structure of synapses. *Neuropharmacology* 76, 628–638.
- Zhu, J.J., Qin, Y., Zhao, M., Van Aelst, L., and Malinow, R. (2002). Ras and Rap control AMPA receptor trafficking during synaptic plasticity. *Cell* 110, 443–455.

**Cell Reports, Volume 23**

**Supplemental Information**

**Wnt Signaling Mediates LTP-Dependent  
Spine Plasticity and AMPAR Localization  
through Frizzled-7 Receptors**

**Faye McLeod, Alessandro Bossio, Aude Marzo, Lorenza Ciani, Sara Sibilla, Saad Hannan, Gemma A. Wilson, Ernest Palomer, Trevor G. Smart, Alasdair Gibb, and Patricia C. Salinas**

SUPPLEMENTAL INFORMATION

SUPPLEMENTAL FIGURES

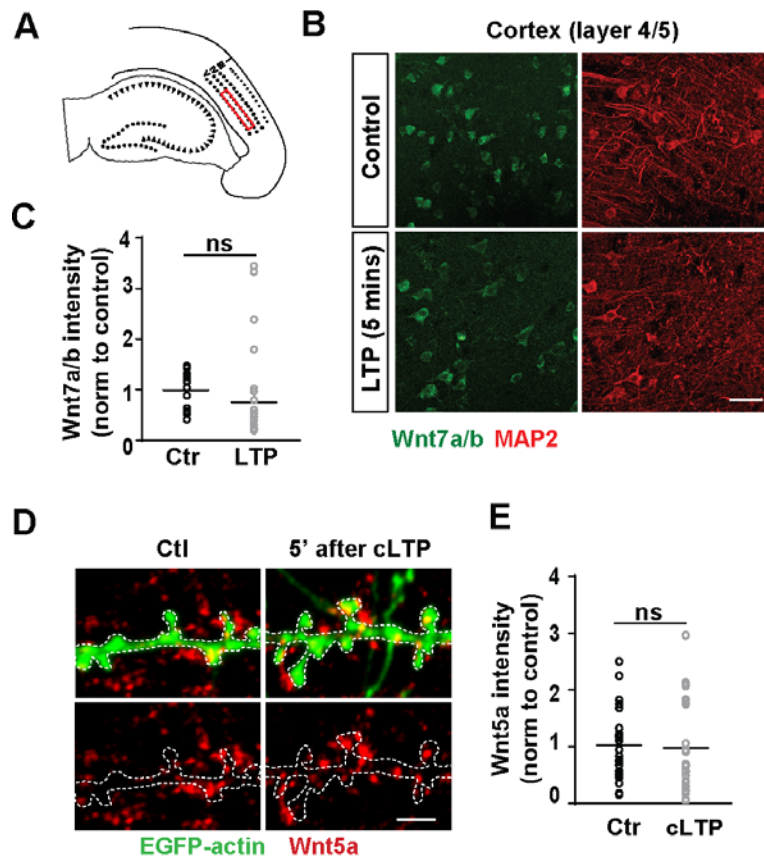

**Figure S1: related to Figure 1. Cortical Wnt7a/b or hippocampal Wnt5a levels do not change 5 minutes after synaptic stimulation.** (A) Schematic of the cortical area (layers 4/5) imaged for analysis (red box). (B) Representative images of endogenous Wnt7a/b staining in control and 5 minutes after LTP induction in the hippocampus. MAP2 (red) used as a reference marker. Scale bar: 25  $\mu$ m. (C) Quantification of cortical Wnt7a/b fluorescence intensity in control and LTP-induced slices normalized to control levels ( $n = 7$  slices from 3 independent experiments, Student's  $t$ -test). (D) EGFP-actin-expressing cultured hippocampal neurons (12-14 DIV) exposed to control or cLTP conditions. Endogenous Wnt5a protein in red (scale bar: 2.5  $\mu$ m). (E) Quantification of Wnt5a fluorescence intensity (normalized to control) in spines measured 5 minutes after cLTP treatment ( $n = 25$ -26 cells per condition, Student's  $t$ -test).

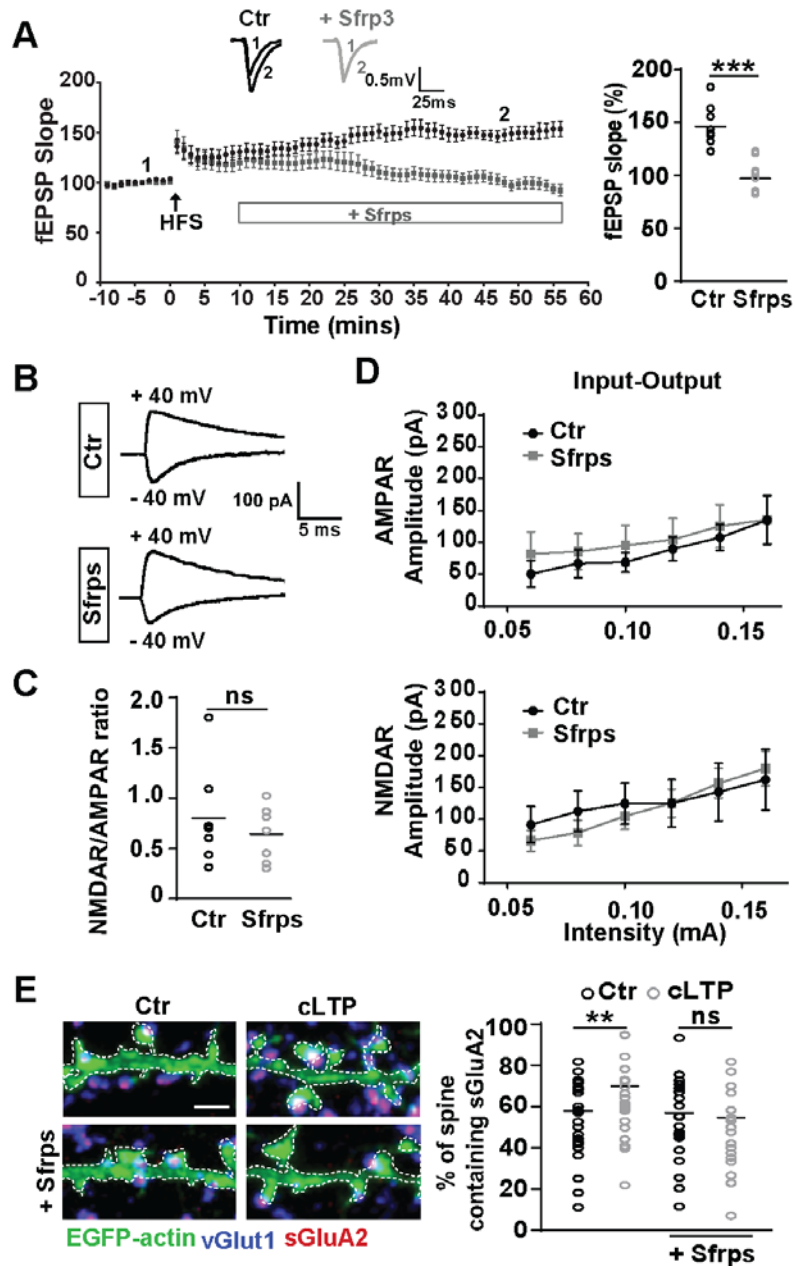

**Figure S2: related to Figures 1 and 2. Sfrps impair the maintenance of LTP and activity-dependent sGluA2 AMPAR localization but do not affect short-term basal synaptic transmission.** (A) Left: impact on LTP maintenance elicited by HFS in control (in black) or Sfrps treated hippocampal slices (in grey). Insets show representative averaged fEPSP recordings before (1) and after HFS (2). Data expressed as mean  $\pm$  SEM. Right: quantification of fEPSPs 60 minutes after HFS (average of last 10 minutes of recording) in control and Sfrps treated slices ( $n = 8-9$  slices per condition from 6 animals, \*\*\* $P < 0.01$ , Student's  $t$ -test). (B) Representative evoked NMDAR (+40 mV; in the presence of  $10\mu\text{M}$  CNQX) and AMPAR (-40mV) EPSC traces from control and Sfrps treated (15 mins) acute hippocampal slices. (C) Ratio of NMDAR- to AMPAR-mediated EPSCs ( $n = 7-8$  cells for each condition from 4 independent experiments, Student's  $t$ -test). (D) Summary graphs of the input-output measurements for each condition ( $n = 7-8$  cells for each condition from 4 independent experiments, ANOVA with repeated measures). Data expressed as mean  $\pm$  SEM. (E) Hippocampal neurons (14 DIV) exposed to control or cLTP conditions, with or without Sfrps. Excitatory presynaptic marker vGluT1 (in blue), surface GluA2 (sGluA2; in red) and EGFP-actin (in green; scale bar:  $2.5\ \mu\text{m}$ ). Quantification of the percentage of spines containing sGluA2 ( $n = 39-52$  cells per condition, \*\* $P < 0.01$ , ANOVA).



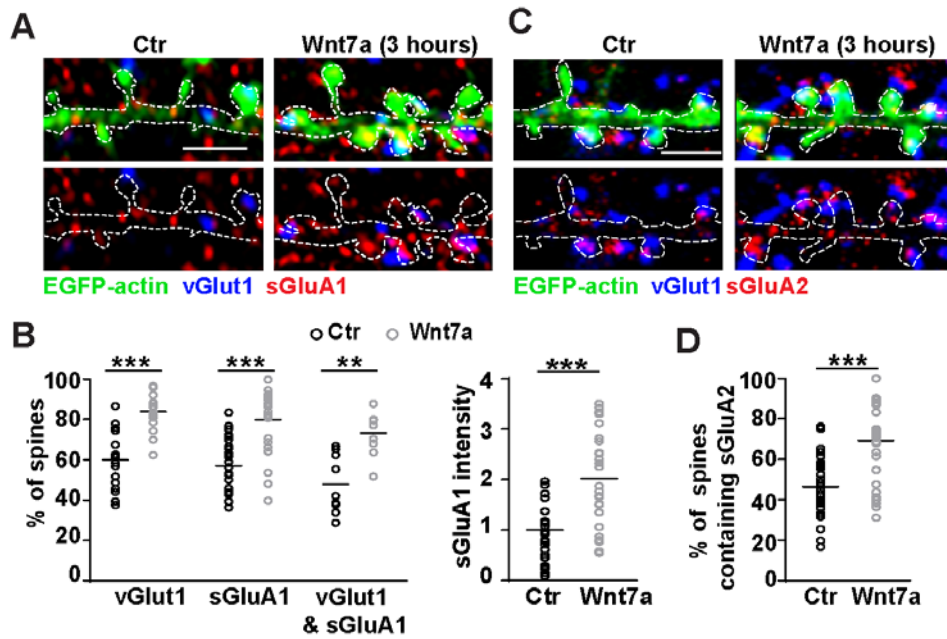

**Figure S3: related to Figure 3. Long-term impact of Wnt7a on surface AMPARs.** (A) Hippocampal neurons (13-14 DIV) treated with control or Wnt7a for 3 hours. vGlut1 (blue) and sGluA1 (red) on dendritic spines visualized by EGFP-actin (green; scale bar: 2.5  $\mu$ m). (B) Percentage of innervated spines (opposed to vGlut1) and spines containing sGluA1 or synapses (co-localization of vGlut1 and sGluA1). sGluA1 intensity in spines normalized to control levels ( $n = 12-31$  cells per condition,  $**P < 0.01$  and  $***P < 0.001$ , Student's  $t$ -test). (C) Cultured hippocampal neurons (13-14 DIV) treated with control or Wnt7a for 3 hours. vGlut1 (blue) and sGluA2 (red) on dendritic spines visualized by EGFP-actin (green; scale bar: 2.5  $\mu$ m). (D) Quantification of percentage of spines containing sGluA2 ( $n = 27-31$  cells per condition,  $***P < 0.001$  Student's  $t$ -test).

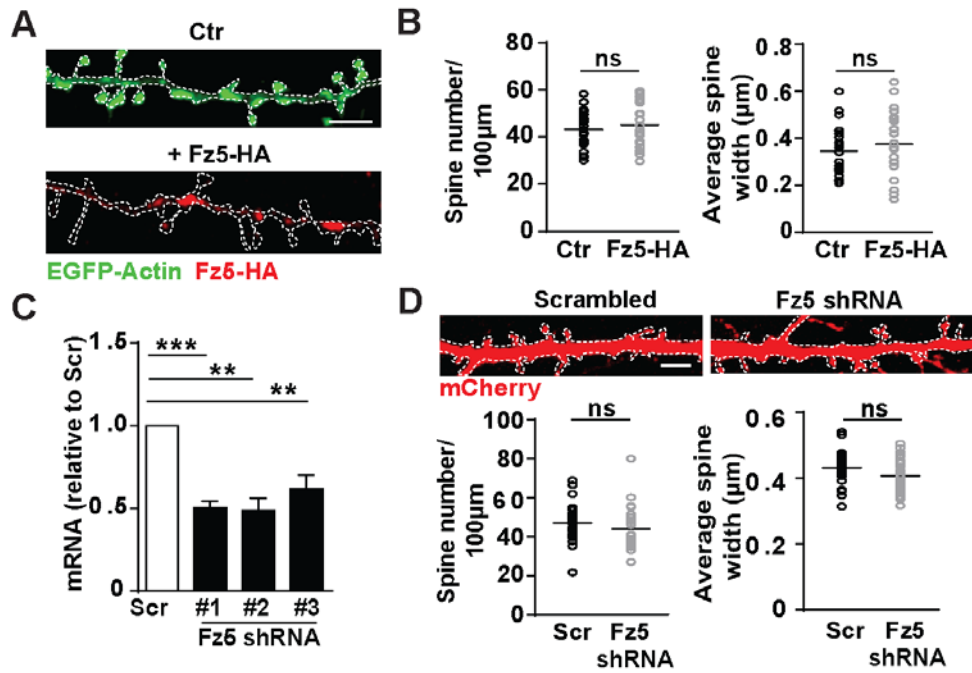

**Figure S4: related to Figure 3. Fz5 receptors are not enriched at dendritic spines and do not affect spine structural plasticity.** (A) Fz5-HA (red) expressing cultured hippocampal neurons (DIV13-14; scale bar: 5 µm). Note the lack of Fz5 in spines (EGFP-Actin annotated dotted lines). (B) Quantification of spine number and width ( $n = 28-32$  cells per condition, Students  $t$ -test). (C) Fz5 mRNA levels in NRK cells transfected with scrambled or three different shRNA clones. Graph represents fold change relative to scrambled shRNA control and data expressed as mean  $\pm$  SEM. Note: Fz5 shRNA clone #1 was used for functional experiments ( $n =$  four independent cultures,  $**P < 0.01$ ,  $***P < 0.001$  by Students  $t$ -test). (D) Above: hippocampal neurons (13-14 DIV) expressing scrambled or Fz5 shRNAs. Neurons labelled with mCherry (scale bar: 2.5 µm). Below: quantification of spine number and width ( $n = 27$  cells per condition, Students  $t$ -test).

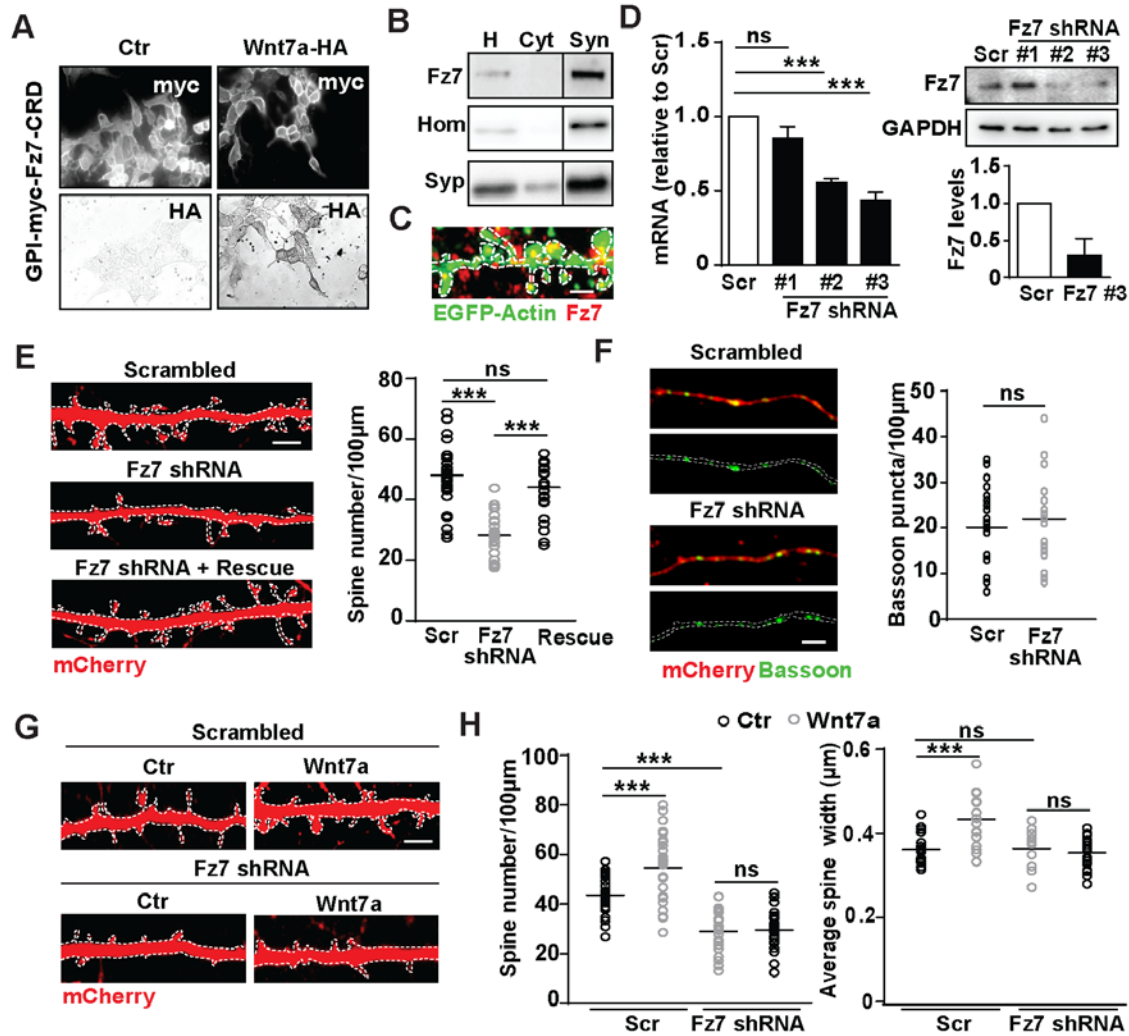

**Figure S5: related to Figure 3. Fz7 receptors are enriched at spines and are required for Wnt7a-induced structural plasticity.** (A) Wnt7a-HA from conditioned medium (dark staining) binds to HEK 293 cells expressing GPI-myc-Fz7-cysteine rich domain (CRD) domain. Conditioned media from EGFP expressing cells was used as control. (B) Representative western blot of adult rat brain homogenates (H), cytosol (Cyt) and synaptosomes (Syn) fractions showing the enrichment of Fz7, Synaptophysin (Syp; presynaptic marker) and Homer1 (postsynaptic marker) in the synaptosome fractions. (C) In cultured hippocampal neurons, endogenous Fz7 (red) is enriched at spines and present on the dendritic shaft. (scale bar: 1 µm). (D) Left: Fz7 mRNA levels (left) obtained from NRK cells transfected with scrambled control or three different shRNA clones respectively. Graphs represent fold change relative to scrambled ( $n =$  four independent cultures,  $**P < 0.01$ ,  $***P < 0.001$  by Students  $t$ -test). Data expressed as mean  $\pm$  SEM. Right: endogenous Fz7 protein levels in cultured hippocampal neurons transfected with scrambled control or three different Fz7 shRNA clones. Quantification of Fz7 shRNA clone #3, the chosen shRNA used for all studies ( $n = 2$  independent cultures). Data expressed as mean  $\pm$  SEM. (E) Left: hippocampal neurons (12-14 DIV) expressing scrambled shRNA, shRNA against Fz7 or both Fz7 shRNA and the rescue construct. Neurons labelled with mCherry (scale bar: 2.5 µm). Quantification of spine number ( $n = 27$  cells per condition,  $***P < 0.001$  ANOVA). (F) Left: isolated axons of hippocampal neurons (9-11 DIV) expressing scrambled or Fz7 shRNA. Neurons labelled with mCherry and presynaptic puncta labelled with Bassoon (green, scale bar: 5 µm). Right: quantification of bassoon puncta along 100 µm of axons ( $n = 21$  cells per condition, Students  $t$ -test) (G) Hippocampal neurons (12-14 DIV) expressing scrambled shRNA or shRNA against Fz7 exposed to control or Wnt7a for 3 hours. Neurons labelled with mCherry (scale bar: 2.5 µm). (H) Quantification of spine number (left) and size (right) in hippocampal neurons exposed to different conditions ( $n = 27$  cells per condition,  $***P < 0.001$ , ANOVA).

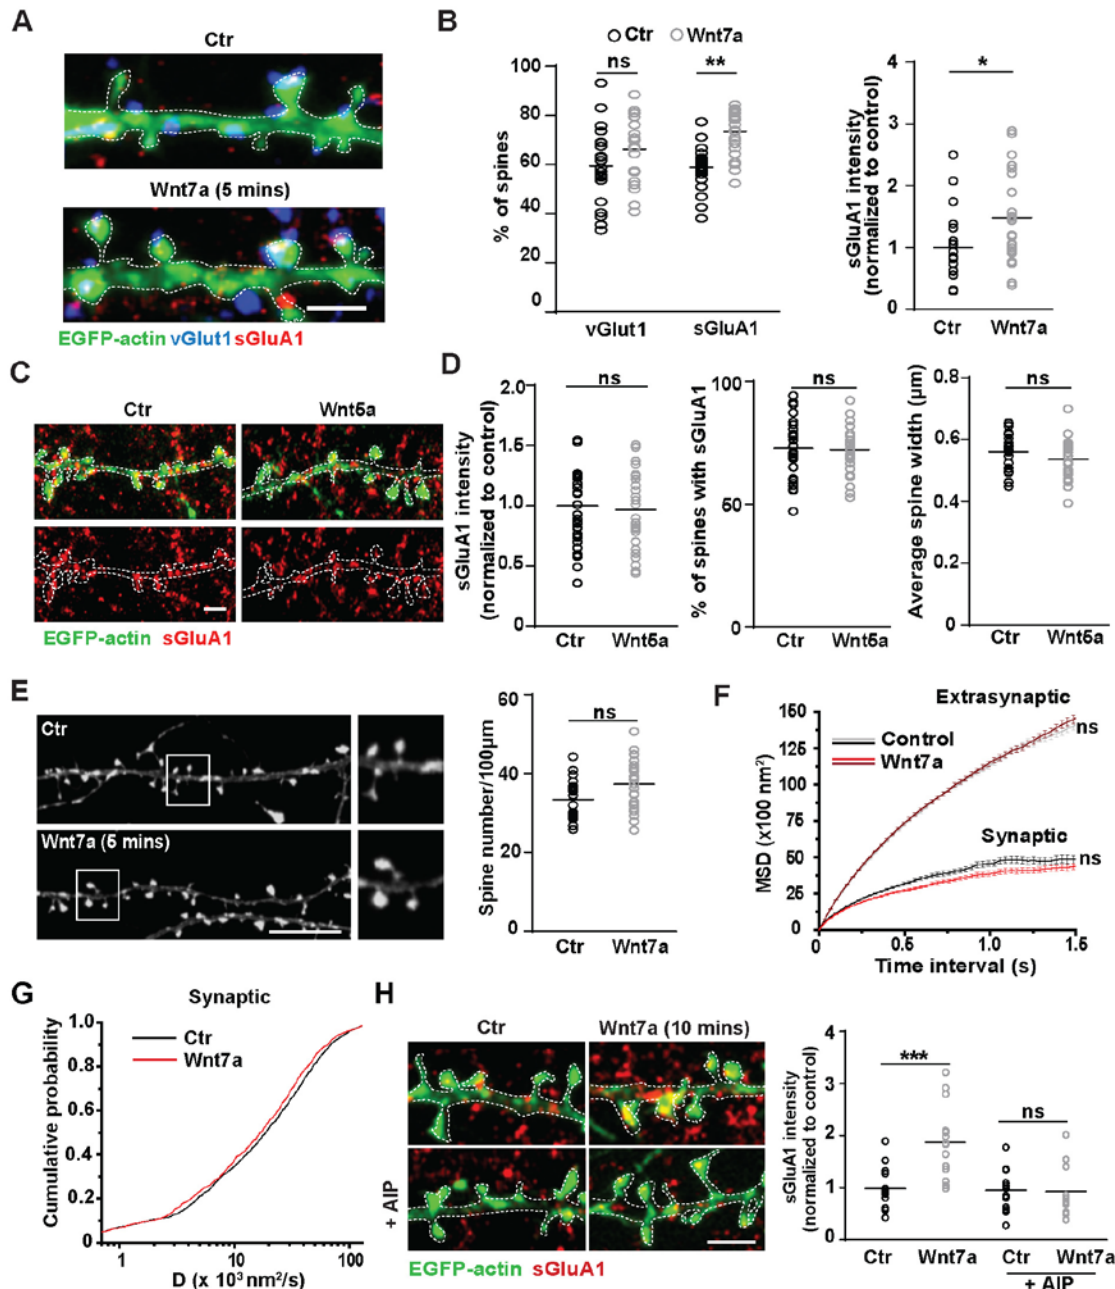

**Figure S6 – related to Figures 4, 5 and 7. Wnt7a rapidly promotes the synaptic localization and diffusion of endogenous GluA1 containing AMPARs in a CaMKII dependent manner without affecting spine number.** (A) Hippocampal neurons (14 DIV) treated with control or Wnt7a for 5 minutes. vGluT1 (blue) and sGluA1 (red) on dendritic spines visualized by EGFP-actin (green; scale bar: 2.5  $\mu$ m). (B) Quantification of spines containing vGluT1 or sGluA1 puncta and the intensity of sGluA1 in spines (normalized to control) (\* $P < 0.05$  and \*\* $P < 0.01$ , Students  $t$ -test,  $n = 23$  cells per condition). (C) EGFP-actin-expressing hippocampal neurons (12 DIV) exposed to control or Wnt5a for 10 minutes. sGluA1 puncta labelled in red (scale bar: 2.5  $\mu$ m) (D) Quantification of sGluA1 intensity in dendritic spines (left), percentage of spines containing sGluA1 and average spine width in control or Wnt5a treated cells ( $n = 24$  cells per condition, Students  $t$ -test). (E) EGFP-actin-expressing hippocampal neurons (14 DIV) exposed to control or Wnt7a for 5 minutes (left) (scale bar: 10  $\mu$ m) and quantification of spine number ( $n = 24$ , Students  $t$ -test). (F) MSD plots representing the confinement of synaptic and extrasynaptic QD-GluA1 between control and Wnt7a (10 minutes). Significance measured using Students  $t$ -test from the area under the curve. Entire dataset  $n = 1638$  (control) and 1409 (Wnt7a) of synaptic trajectories and 12350 (control) and 10459 (Wnt7a) of extrasynaptic trajectories from 4 independent experiments. (G) Cumulative probability of D-coefficient in log scale for QD-GluA1 at synapses in control and Wnt7a (10 minutes) treated cells. (H) EGFP-actin-expressing hippocampal neurons (12-14 DIV) exposed to control or Wnt7a for 10 minutes with or without the CaMKII inhibitor AIP. sGluA1 puncta labelled in red (scale bar: 2.5  $\mu$ m). Quantification of sGluA1 intensity on spines (normalized to control) ( $n = 15$  cells per condition, \*\*\* $P < 0.001$ , ANOVA).

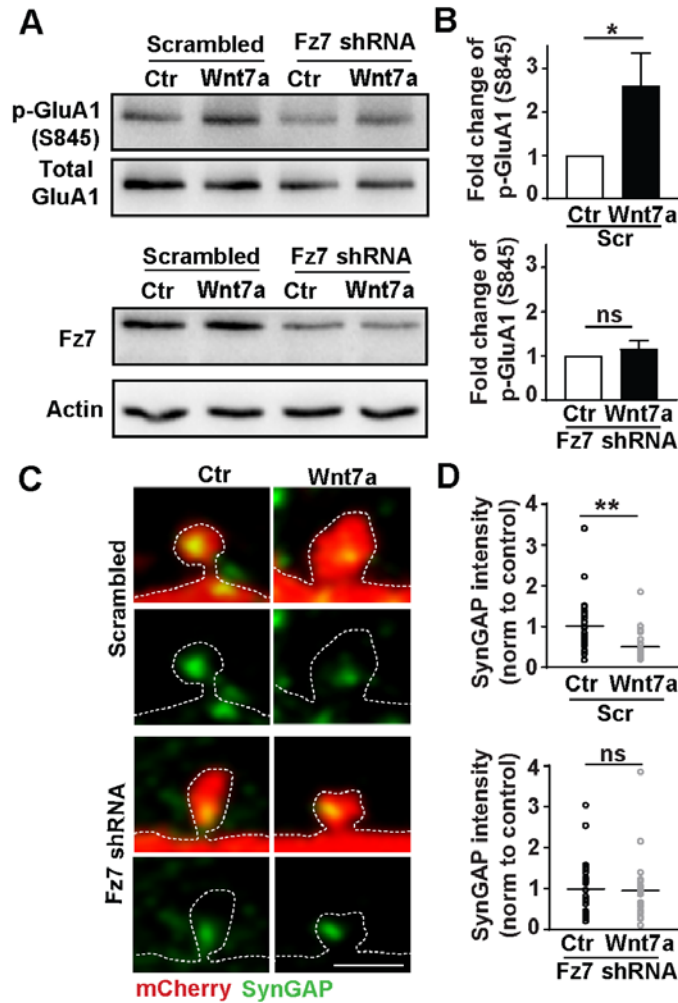

**Figure S7 – related to Figures 3, 6 and 7. Fz7 receptors are required for Wnt7a-induced phosphorylation of GluA1 (S845) and SynGAP removal from dendritic spines. (A)** Top: phosphorylation of GluA1 at S845 (p-GluA1) in cells infected with AAV1 scrambled or Fz7shRNA followed by 20 minutes exposure to control or Wnt7a (12 DIV). Bottom: Fz7 protein levels in cells infected with AAV1 scrambled or Fz7shRNA. **(B)** Quantification of p-GluA1 levels normalized to total GluA1 upon Wnt7a treatment. Graphs show fold changes in S845 levels relative to controls. AAV1 scrambled (above) and Fz7 shRNA (below) infected cells. (\* $P < 0.05$ , Student's *t*-test,  $n = 5$  experiments per data set). Data expressed as mean  $\pm$  SEM. **(C)** Evaluation of endogenous SynGAP (green) in spines from neurons expressing mCherry scrambled or Fz7 shRNA (12 DIV) and exposed to control or Wnt7a for 10 minutes (scale bar: 1  $\mu$ m). **(D)** Quantification of SynGAP intensity within small to medium spines normalized to control levels in scrambled (top) or Fz7 shRNA (bottom) transfected cells (\*\* $P < 0.01$  by Student's *t*-test,  $n = 25$  cells per condition).

## SUPPLEMENTAL EXPERIMENTAL PROCEDURES

### Cultures and Constructs

Primary hippocampal cultures were prepared from E18 embryos of Sprague-Dawley rats as described previously (Dotti et al, 1988) and maintained in Neurobasal medium supplemented with N-2 (Life Technologies, Paisley, UK), B27 (Life Technologies), D-glucose and L-glutamine for 13-14 days in vitro (DIV).

Scrambled (5'-GGCGTTACGTCCTAACATGCG-3'), Fz5 shRNA (5'-GAACTCGCTACGAGGCTTTGT-3') and Fz7 shRNA (5'-GGTGGGTCATTCTTCCCTCA-3') target sequences were cloned into an AAV vector expressing mCherry. KD of Fz7 will only affect those neurons where the shRNA is expressed (a cell autonomous phenotype) therefore, we carefully performed our structural and functional studies on cells specifically labelled with mCherry.

Organotypic slices were maintained for 2 weeks in MEM based culture media. Fz7 functional studies were performed using the same scrambled and shRNA target sequences as above and packaged with AAV1. Infection of brain slices was performed one day after culturing using a pressure micro injector (PMI-100, Dagan Corporation, Minneapolis, USA).

### Drug Treatment

Purified recombinant Wnt7a (100-150 ng/mL; PeproTech, London, UK) was applied to neurons in Neurobasal medium at 37°C for different time periods depending on the experiment. Bovine serum albumin (BSA) was used as a control. For Protein Kinase A (PKA) inhibition, neurons were pre-incubated with myristoylated PKI (14-22) amide (5 µM; Tocris, Bristol, UK) for 15 minutes prior to and during Wnt7a treatment. For CaMKII inhibition, neurons were treated with myristoylated AIP (1 µM; Calbiochem, Darmstadt, Germany) during Wnt7a treatment.

### Real-time PCR

Total RNA from NRK cells was extracted with Trizol Reagent (Life Technologies) and Direct-zol™ (Zymo Research, California, USA). Briefly, cells were washed with cold PBS and collected with Trizol. Once homogenized, 1 volume of ethanol absolute was added to each sample and loaded into Direct-zol columns. RNA was extracted following the manufacturer's instructions, including in column DNases treatment. RNA was quantified by absorbance at 260 nm using a Nanodrop ND-100 (Thermo Scientific, Dartford, UK). Retrotranscription to first strand cDNA was performed using RevertAid H Minus First Strand cDNA Synthesis kit (Thermo Scientific). 5 ng of synthesized cDNA was used to perform the qPCR using GoTaq® qPCR Master Mix (Promega, Wisconsin, USA) in a CFX96 Touch™ Real-Time PCR Detection System (Bio-Rad Laboratories, Inc.). Each sample was run in triplicates.

To detect Fzd7 and Fzd5 transcripts we used the primers at 0,5 µM final concentration (primers purchased from Sigma-Aldrich, Dorset, UK: Fzd7 Fw 5'- GCAGTGGCTGAAAAGACTCC- 3'; Fzd7 Rv 5'- CAGTTAGCATCGTCCTGCAA-3'; Fzd5 Fw 5'- TCTGTTATGTGGGCAACCAA-3'; Fzd5 Rv 5'- CCAAGACAAAGCCTCGTAGC-3'). Gapdh was used as a housekeeping gene (Sigma-Aldrich; Gapdh Fw 5'- ATGGCCTTCCGTGTTCCCTAC-3'; Gapdh Rv 5'-CATACTTGGCAGGTTTCTCCA-3').

### Chemical Long-Term Potentiation

Long-term potentiation (LTP) was induced in cultured hippocampal neurons with a glycine-mediated form of chemical LTP (cLTP) as previously described (Fortin et al, 2010, Stamatakou et al, 2013). Prior to stimulation, neurons were incubated at room temperature for 20-30 minutes in control solution (125 mM NaCl, 2.5 mM KCl, 1 mM MgCl<sub>2</sub>, 2 mM CaCl<sub>2</sub>, 33 mM D-glucose, 5 mM HEPES, 20 µM D-APV, 3 µM strychnine, 20 µM bicuculline and 0.5 µM TTX; pH 7.4). cLTP was induced for 10 minutes at room temperature with the same solution as above but containing glycine (200 µM) without Mg<sup>2+</sup>, TTX, and D-APV. After cLTP induction, neurons were returned to control solution for 5 or 60 minutes before fixation and 20 minutes before AMPAR-mediated miniature EPSC (mEPSC) recordings.

### Immunofluorescence, Image Acquisition and Analyses

Hippocampal neurons were fixed with 4% paraformaldehyde (PFA)/4% sucrose in PBS for 20 minutes at room temperature, permeabilised with 0.05% Triton, blocked with 5% BSA then incubated with primary antibodies overnight at 4°C. Primary antibodies against GFP (Cat no: 06-896, Millipore, Darmstadt, Germany), vGlut1 (Cat

no: ab5905 Millipore, Darmstadt, Germany), Wnt7a/b (Cat no: AF3460, R&D Systems, Minneapolis, Minnesota, USA), Wnt5a (Cat no: ab174963, Abcam, Cambridge, UK), mCherry (Cat no: ab167453, Abcam), Fz7 (Cat no: 06-1063 Millipore), SynGAP (Cat no: ab3344; Cat no: ab223251, Abcam), and HA tag (Cat no: 11867423001, Sigma-Aldrich) were used. For surface GluA1 (Cat no: PC246, Millipore) and GluA2 (Cat no: MAB 397, Millipore) staining, live cells were incubated with each antibody for 10-15 minutes at 37°C before fixation. Secondary antibodies Alexa-488, Alexa-568 and Alexa-647 were from Molecular Probes, Paisley, UK. Fluorescence images of pyramidal neurons were captured by confocal microscopy. We used an Olympus FV1000 inverted confocal microscope using a 60x oil-immersion objective (NA = 1.40) producing image stacks of 162.7 X 162.7  $\mu\text{m}$  or a Leica TCS SP1 confocal microscope using a 63x oil objective (NA = 1.32) and producing images stacks of 157.8 x 157.8  $\mu\text{m}$ . The average z-depth of each image was  $\sim 3\mu\text{m}$ . Image acquisition was completed on the same microscope per dataset.

For each experiment, 8-12 images of cells were taken per condition and analyzed using Volocity software (Improvision, Llantrisant, UK). Dendritic spine morphology was measured manually such that for every EGFP-actin or mCherry-expressing cell, 3-4 dendrites ( $\sim 50$ -100  $\mu\text{m}$  in length each) containing roughly 100 spines were cropped from maximum projections. Spine width was quantified by placing the line tool over the maximum spine head width and the number of spines was counted and normalized to the length of the dendrite. The presence of synaptic puncta (GluA1, GluA2, SynGAP and vGlut1) adjacent or on spines was detected using custom Volocity threshold protocols and confirmed manually through visualization of each individual focal plane. Extrasynaptic puncta were defined as puncta not opposed to vGlut1 along the dendrite. Fluorescent intensity measurements were calculated on cropped spines and dendrites using custom Volocity threshold protocols and normalized to controls. SynGAP intensity was specifically measured on spines with a volume of 1.5  $\mu\text{m}^3$  or less to eliminate large spines as Wnt7a activates CaMKII in small and medium size spines but not in large ones (Ciani et al, 2011). Wnt7a/b intensity was normalized to the volume of the dendritic spine based on EGFP-Actin or mCherry labelling.

Acute hippocampal slices (400 $\mu\text{m}$  thick from P28 rats) were fixed in 4% PFA/4% sucrose in PBS for one hour and incubated in blocking solution (10% donkey serum, 0.02% Triton X-100 in PBS) for  $\sim 4$ -6 hours at room temperature. Primary antibodies against Wnt7a/b (R&D Systems) and MAP2 (Abcam) were applied overnight at 4°C. Slices were subsequently washed in PBS and incubated with secondary antibodies Alexa-488, Alexa-568 and Alexa-647 for 2-3 hours at room temperature. To label cell nuclei, slices were incubated with Hoechst stain for 5 minutes before being mounted in Fluoromount-G (SouthernBiotech, Cambridge, UK).

Fluorescence images of the hippocampus (CA1 pyramidal cell layer and stratum radiatum) were captured on an Olympus FV1000 inverted confocal microscope using a 40x objective (NA = 0.95) and image stacks acquired with a z-step of 1  $\mu\text{m}$ . Three z-stacks were taken in each hippocampal region per slice, from 3 slices per animal. Wnt7a/b and MAP2 staining was detected and fluorescence intensity calculated using custom Volocity software threshold protocols. MAP2 intensities were used to normalize Wnt7a/b signal intensity. The intensity in the stratum radiatum was measured after removing the cell bodies from the analyses.

### **Western Blot Analysis**

Equal amounts of protein (Lowry assay) were loaded on a 10% SDS/PAGE and western blots probed with primary antibodies against total GluA1 (Cat no: 13185S Cell Signalling, Danvers, Massachusetts, USA), phospho-Ser845 (Cat no: PPS008, R&D Systems), total ERK (ERK-1&2, Cat no: M6670, Sigma-Aldrich), phospho-ERK (diphosphorylated ERK-1&2, Cat no: M8159 Sigma-Aldrich), Synaptophysin (Cat no: MAB5258, Millipore), Homer1 (Cat no: 160003, Synaptic Systems, Göttingen, Germany), Fz7 (Cat no: ab64636, Abcam),  $\beta$ -Actin (Cat no: 8457 Cell Signalling), GAPDH (Cat no: ab181602 Abcam),  $\alpha$ -Tubulin (Cat no: T9026, Sigma-Aldrich). Band intensity was measured using the Gel Analysis method in ImageJ software. The level of GluA1 and ERK phosphorylation was determined by calculating the ratio of phosphorylated protein over the total protein. Phospho-ERK levels were first normalized for loading using  $\alpha$ -Tubulin and then to total Erk levels from samples run in a separate gel in which  $\alpha$ -Tubulin was also used as control.

### **Synaptosomal Preparation**

Synaptosomes were prepared as previously described (Cohen et al, 1977). All steps were performed at 4°C and all buffers contained protease inhibitors. Brains from P20 rats were homogenized in Syn-PER buffer (Thermo Scientific) and centrifuged at 1,200g for 10 min. The supernatant was centrifuged at 15,000g for 20 minutes, and the pellet was resuspended in Syn-PER buffer. This sample was then layered on top of a discontinuous sucrose gradient (0.85/1.0/1.2 M sucrose in 4 mM Hepes at pH 7.4) and centrifuged at 53,000g for 2 hours in a swinging bucket (Beckman SW28). The synaptosomal fraction was taken from the 1–1.2 M sucrose interface, incubated

with an equal volume of Triton buffer (80mM Tris pH 8.0/1% Triton) for 25 minutes and then centrifuged at 21,000g for 20 minutes. The supernatant was removed and the pellet resuspended in Syn-PER buffer.

### **Binding Assay**

HEK 293 cells were transfected with the CRD domain of human Fz7 containing a glycosyl-phosphatidylinositol (GPI) sequence (GPI-myc-Fz7-CRD). Subsequently, cells were then incubated for 1 hour at RT with control or Wnt7a-HA-containing conditioned media (from QT6 cells) then fixed with 4% PFA. Primary antibodies to HA (Sigma-Aldrich) and Myc (Sigma-Aldrich) was used followed by incubation with HRP-biotinylated (Amersham) and Alexa-488 conjugated secondary antibodies.

### **Electrophysiology**

AMPA-mediated mEPSCs were recorded from hippocampal neurons (250 cells/mm<sup>2</sup>) on an upright microscope and continuously perfused at room temperature with oxygenated (95% O<sub>2</sub>/5% CO<sub>2</sub>) recording artificial cerebrospinal fluid (ACSF) solution containing (in mM): NaCl (125), NaHCO<sub>3</sub> (25), KCl (2.5), NaHPO<sub>4</sub> (1.25), D-glucose (25), supplemented with CaCl<sub>2</sub> (1), MgCl<sub>2</sub> (1), bicuculline (0.01), APV (0.05) and TTX (0.0001). Spontaneous EPSC (sEPSC) were recorded from hippocampal neurons perfused in a solution containing (in mM): NaCl (145), KCl (3), CaCl<sub>2</sub> (1.5), MgCl<sub>2</sub> (1), HEPES (10), D-glucose (10) and glycine (0.01) adjusted to pH 7.4. All cells were voltage-clamped at -60 mV in the whole cell configuration using borosilicate glass patch electrodes (5–8 MΩ) filled with an intracellular solution containing (in mM): D-gluconic acid lactone (139), HEPES (10), EGTA (10), NaCl (10), CaCl<sub>2</sub> (0.5), MgCl<sub>2</sub> (1), ATP (1) and GTP (1) adjusted to pH 7.2 with CsOH.

NMDA/AMPA ratio experiments and input-output experiments were performed in acute transverse hippocampal slices (300 μm) from P28 rats in recording ACSF supplemented with (in mM): CaCl<sub>2</sub> (2), MgCl<sub>2</sub> (1). NMDAR EPSCs were recorded at +40 mV in containing CNQX (10 μM) and bicuculline (10 μM) and AMPAR EPSCs were recorded at -40 mV in the presence of bicuculline. Recording glass microelectrodes (filled with the same intracellular solution as above including 5mM QX-314) were positioned in CA1 pyramidal cell layer whilst concentric bipolar stimulating electrodes were placed in SC afferent fibres. The peak averaged NMDAR EPSCs were divided by the averaged AMPAR EPSCs.

Field EPSP (fEPSP) recordings were performed in acutely prepared transverse hippocampal slices (400 μm) from P28 rats. After a 1 hour equilibration period, slices were placed into an interface-like chamber and perfused at 32°C with oxygenated recording solution supplemented with (in mM): CaCl<sub>2</sub> (2), MgCl<sub>2</sub> (1) and DPCPX (0.01; adenosine A1 receptor blocker). Recording glass microelectrodes (resistance 1-2 MΩ) were filled with the same recording ACSF and positioned in the stratum radiatum of the CA1 region whilst concentric bipolar stimulating electrodes were placed in SC afferent fibres to record fEPSPs. Paired pulse stimuli were given 50 ms apart every 10 seconds with a stimulation strength set to approximately 50% of the strength giving a maximal response. Following a stable 20 minute baseline recording (<10% change in fEPSP slope), LTP was induced by high frequency stimulation (HFS; a single train of 100 stimuli at 100 Hz) and fEPSPs monitored for 1 hour. To block Wnts, Sfrp3 (250 ng/mL) was applied 10 minutes before HFS and present during LTP.

Pairing LTP experiments were performed in organotypic hippocampal slices (DIV 9-16) infected with AAV1-expressing scrambled or Fz7 shRNA constructs. Slices were continuously perfused at room temperature with oxygenated (95% O<sub>2</sub>/5% CO<sub>2</sub>) recording solution supplemented with (in mM): CaCl<sub>2</sub> (4), MgCl<sub>2</sub> (4), 2-chloroadenosine (2-3) and picrotoxin (0.05). Patch recording pipettes (3–8 MΩ) were filled with 140 mM cesium methanesulfonate, 8 mM CsCl, 10 mM HEPES, 2 mM Mg<sub>2</sub>ATP, 0.3 mM Na<sub>3</sub>GTP, 7 mM sodium phosphocreatine, spermine 0.1mM and 0.25 mM EGTA, pH 7.25. Synaptic responses were evoked with concentric bipolar stimulating electrodes placed in SC afferent fibres (single voltage pulses 200 μs). Pairing LTP was induced in CA1 neurons by pairing 3 Hz presynaptic stimulation of the Schaffer collaterals with 0 mV postsynaptic depolarization for 1.5 minutes.

All currents were recorded using an Axopatch 200B amplifier, filtered (1 kHz) and digitised (10 kHz). Data was monitored online and analyzed offline using WinEDR and WinWCP software (available free online at [http://spider.science.strath.ac.uk/sipbs/software\\_ses.htm](http://spider.science.strath.ac.uk/sipbs/software_ses.htm)).

### **Live imaging of SEP-GluA1 and analyses**

Time-lapse experiments of SEP-GluA1 were performed on an Olympus FV1000 inverted confocal microscope using a 60x oil-immersion objective (NA = 1.40) with temperature controlled chamber maintained at 37°C.



Neurons were placed into a chamber with HEPES buffered solution containing (in mM): NaCl (120), HEPES (10), Glucose (10), CaCl<sub>2</sub> (2) and MgCl<sub>2</sub> (1) adjusted to pH 7.3 with KOH. Transfected neurons with SEP-GluA1 and mRFP (to detect spines) were identified under epifluorescence and images acquired sequentially using a maximum 10% of laser power (488 nm and 559 nm) in a 512 x 512 format, 500 Hz speed, 3-line averaging, and 2.0 optical zoom. Z-stacks (~10 frames) were acquired every minute for at least 20 minutes. Control or Wnt7a (150 ng/mL) was applied directly to neurons in HEPES buffered solution before image acquisition. Data was analyzed on the projected z-stack using ImageJ software from manually selected regions of interest (ROI) around each spine head or just below the spine on the dendritic shaft (extrasynaptic). Integrated density values (which considers the area analyzed and the fluorescence intensity) within each ROI were acquired and subtracted from background levels at each minute in the time-lapse recording. Data for each ROI were normalized to baseline values of that same ROI obtained before addition of Control or Wnt7a. Spine volume was measured as the integrated density of mRFP on a given spine normalized to the integrated density of the adjacent dendrite, to correct for any bleaching that may have occurred during live imaging.

### Single-Particle Imaging of AMPARs

Hippocampal neurons were quickly rinsed and incubated with the primary antibody against GluA1 (Cat no: PC246, Millipore) for 2 minutes. Subsequently neurons were washed for 30 seconds, incubated with a biotinylated anti-rabbit IgG secondary antibody (Vector Laboratories, Peterborough, UK) for 1 minute then washed for 30 seconds. Lastly, streptavidin-coated Quantum Dots (QDs) emitting at 655 nm (QD655; 50 pM; Life Technologies) dissolved in 2% BSA in Borate buffer was applied to neurons and washed for 1 minute respectively. All incubations and washes were performed at 37°C in Krebs solution containing (in mM): NaCl (140), KCl (4.7), MgO<sub>2</sub>\*6H<sub>2</sub>O (12), CaCl<sub>2</sub> (2.52), Glucose (11) and HEPES (5) adjusted to pH 7.4.

QD655-tagged AMPARs were imaged immediately using an Olympus IX71 inverted microscope, with a 60x objective (NA = 1.35) and halogen lamp illumination (PhotoFluor-II Metal Halide illumination system). Images were acquired using a back-illuminated electron-multiplying charge coupled device (EMCCD) camera (iXon3 885; Andor Technology, Belfast, UK) with minimum exposure (typically 30-100 ms) in 16 bits using Cairn-Metamorph Meta Imaging software (Molecular Devices, Wokingham, UK). At the start of time-lapse recordings, an image of the EGFP-actin labelled dendrite was acquired followed by an image sequence of 300 frames at 33 Hz for QD655.

### Single-Particle Tracking and Quantitative Analyses of Lateral Diffusion

Single-particle tracking of QD655-tagged AMPARs involved the detection of the centre of the QD spot fluorescence by a two-dimensional Gaussian fit with a spatial resolution of 10 – 20 nm for each image frame using a Matlab (MathWorks) based software, SPTrack (Hannan et al, 2016). The Gaussian peaks of consecutive frames were joined using estimated diffusion coefficient and maximum likelihood. The mean square displacement (MSD; surface explored) of each QD was calculated using the following equation:

$$\text{MSD}(ndt) = (N - n)^{-1} \sum_{i=1}^{N-n} ((x_{i+n} - x_i)^2 + (y_{i+n} - y_i)^2)$$

where  $x_i$  and  $y_i$  are the spatial co-ordinates of a QD on any image frame  $i$ ,  $N$  is the total number of points in the trajectory,  $dt$  is the time interval between two successive frames (33 ms), and  $ndt$  is the time interval over which the displacement is averaged. From the MSD plot, the diffusion coefficient (a measure of how far and fast the QDs are moving),  $D$ , for a QD was calculated by fitting the first two to five points of the MSD plot against time with the following equation:

$$\text{MSD}(t) = 4D_{2-5} t + 4\sigma_x^2$$

where  $\sigma_x$  is the QD localization accuracy in one direction.

Synaptic regions were visualized in EGFP-actin-expressing neurons. Images were processed and thresholded to observe spines using ImageJ plug-in (TopHatFilter). QD trajectories that co-localized with spines were defined as synaptic. QD data was analyzed using Origin (Version 6) and built-in functions in Matlab. Immobile QDs were defined as having a D-coefficient less than 0.007  $\mu\text{m}^2/\text{s}$  as previously described (Tardin et al, 2003).

## **SUPPLEMENTAL REFERENCES**

Tardin, C, Cognet, L, Bats, C, Lounis, B, and Choquet, D. (2003). Direct imaging of lateral movements of AMPA receptors inside synapses. *EMBO J* 22, 4656-4665.
